# Supplementary material for: Synthesis and anticancer activity studies of α-aminoalkylated conjugated nitroalkenes
Source: Royal Society of Chemistry journal article supplement (doi:10.1039/b607537a), 2006-01-01
Supplement: b607537a_2.pdf [file b607537a_2.pdf]

HPLC Data and Profiles  
For

**Synthesis and anticancer activity studies of  $\alpha$ -aminoalkylated conjugated  
nitroalkenes**

Namrata Rastogi, Renu Mohan, Dulal Panda,\* Shaikh Mobin, Irishi N. N. Namboothiri\*

Table of Contents

|                                                                         | Page |
|-------------------------------------------------------------------------|------|
| 1 Table S1. HPLC data for MBH adducts <b>3a-k</b>                       | 2    |
| 2 Figure S1. HPLC profile (AcCN/H <sub>2</sub> O, 90:10) of <b>3a</b>   | 3    |
| 3 Figure S2. HPLC profile (MeOH/H <sub>2</sub> O, 40:60) of <b>3a</b>   | 4    |
| 4 Figure S3. HPLC profile (AcCN/H <sub>2</sub> O, 90:10) of <b>3b</b>   | 5    |
| 5 Figure S4. HPLC profile (MeOH/H <sub>2</sub> O, 40:60) of <b>3b</b>   | 6    |
| 6 Figure S5. HPLC profile (AcCN/H <sub>2</sub> O, 90:10) of <b>3c</b>   | 7    |
| 7 Figure S6. HPLC profile (MeOH/H <sub>2</sub> O, 40:60) of <b>3c</b>   | 8    |
| 8 Figure S7. HPLC profile (AcCN/H <sub>2</sub> O, 90:10) of <b>3d</b>   | 9    |
| 9 Figure S8. HPLC profile (MeOH/H <sub>2</sub> O, 40:60) of <b>3d</b>   | 10   |
| 10 Figure S9. HPLC profile (AcCN/H <sub>2</sub> O, 90:10) of <b>3e</b>  | 11   |
| 11 Figure S10. HPLC profile (MeOH/H <sub>2</sub> O, 40:60) of <b>3e</b> | 12   |
| 12 Figure S11. HPLC profile (AcCN/H <sub>2</sub> O, 90:10) of <b>3f</b> | 13   |
| 13 Figure S12. HPLC profile (MeOH/H <sub>2</sub> O, 40:60) of <b>3f</b> | 14   |
| 14 Figure S13. HPLC profile (AcCN/H <sub>2</sub> O, 90:10) of <b>3g</b> | 15   |
| 15 Figure S14. HPLC profile (MeOH/H <sub>2</sub> O, 40:60) of <b>3g</b> | 16   |
| 16 Figure S15. HPLC profile (AcCN/H <sub>2</sub> O, 90:10) of <b>3h</b> | 17   |
| 17 Figure S16. HPLC profile (MeOH/H <sub>2</sub> O, 40:60) of <b>3h</b> | 18   |
| 18 Figure S17. HPLC profile (AcCN/H <sub>2</sub> O, 90:10) of <b>3i</b> | 19   |
| 19 Figure S18. HPLC profile (MeOH/H <sub>2</sub> O, 40:60) of <b>3i</b> | 20   |
| 20 Figure S19. HPLC profile (AcCN/H <sub>2</sub> O, 90:10) of <b>3j</b> | 21   |
| 21 Figure S20. HPLC profile (MeOH/H <sub>2</sub> O, 40:60) of <b>3j</b> | 22   |
| 22 Figure S21. HPLC profile (AcCN/H <sub>2</sub> O, 90:10) of <b>3k</b> | 23   |
| 23 Figure S22. HPLC profile (MeOH/H <sub>2</sub> O, 40:60) of <b>3k</b> | 24   |

**Table S1.** HPLC data for MBH adducts **3a-k**.

| Entry | Compd     | HPLC                          |          |                               |          |
|-------|-----------|-------------------------------|----------|-------------------------------|----------|
|       |           | AcCN/H <sub>2</sub> O (90:10) |          | MeOH/H <sub>2</sub> O (40:60) |          |
|       |           | Retention Time (min)          | % Purity | Retention Time (min)          | % Purity |
| 1     | <b>3a</b> | 3.167                         | 100.0    | 4.450                         | 100.0    |
| 2     | <b>3b</b> | 3.108                         | 100.0    | 7.333                         | 100.0    |
| 3     | <b>3c</b> | 2.925                         | 100.0    | 8.867                         | 95.1     |
| 4     | <b>3d</b> | 3.200                         | 99.8     | 4.625                         | 100.0    |
| 5     | <b>3e</b> | 3.050                         | 100.0    | 4.625                         | 98.8     |
| 6     | <b>3f</b> | 3.325                         | 100.0    | 7.075                         | 100.0    |
| 7     | <b>3g</b> | 5.767                         | 100.0    | 6.750                         | 99.3     |
| 8     | <b>3h</b> | 3.267                         | 100.0    | 5.367                         | 100.0    |
| 9     | <b>3i</b> | 3.333                         | 100.0    | 5.475                         | 100.0    |
| 10    | <b>3j</b> | 7.758                         | 100.0    | 6.458                         | 95.2     |
| 11    | <b>3k</b> | 7.867                         | 99.9     | 6.983                         | 100.0    |

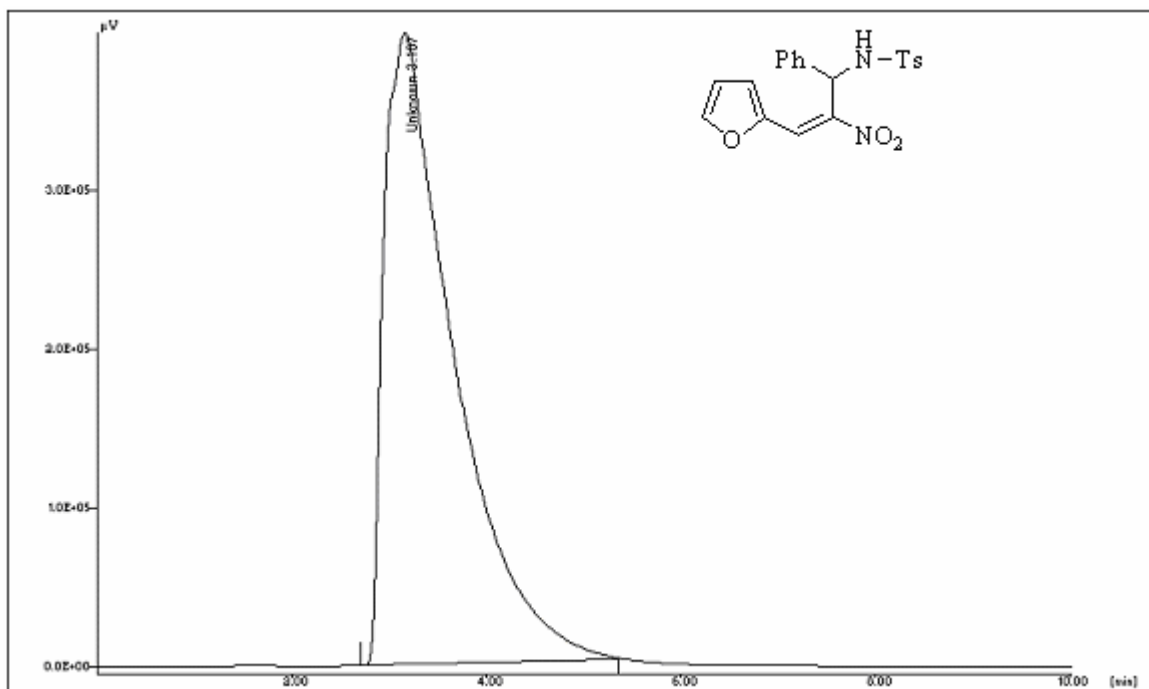

File name: NR-152

Info:

Sample: Aza-MBH

Gradient: 90:10 MeCN/H<sub>2</sub>O

Wavelength: 355 nm

Flow rate: 1 ml/min

Vial # = 1 Rack # = 1

X Units: [min] Y Units: μV

Acquisition Time: 10.03 [min]

Control Method:

Code of system chromatographic: JASCO HPLC

| # | Name      | RT    | Area [μV.Sec] | % Area  |
|---|-----------|-------|---------------|---------|
| 1 | <b>3a</b> | 3.167 | 19446643.750  | 100.000 |

Total Area of Peak = 19446643.750 [μV.Sec]

Injection Volume = 20.00 μl

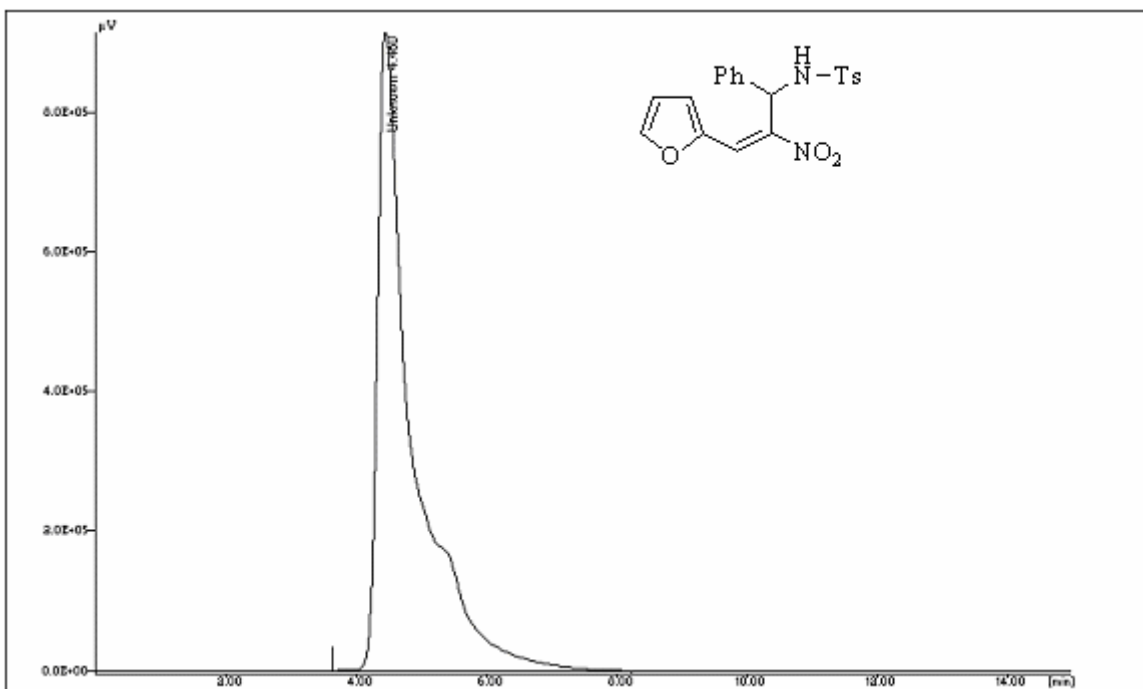

File name: NR-152

Info:

Sample: Aza-MBH

Gradient: 40:60 MeOH/H2O

Wavelength: 355 nm

Flow rate: 0.5 ml/min

X Units: [min] Y Units:  $\mu\text{V}$

Acquisition Time: 15.00 [min]

Control Method:

Code of system chromatographic: JASCO HPLC

| # | Name      | RT    | Area [ $\mu\text{V}\cdot\text{Sec}$ ] | % Area  |
|---|-----------|-------|---------------------------------------|---------|
| 1 | <b>3a</b> | 4.450 | 32919955.000                          | 100.000 |

Total Area of Peak = 32919955.000 [ $\mu\text{V}\cdot\text{Sec}$ ]

Injection Volume = 20.00  $\mu\text{l}$

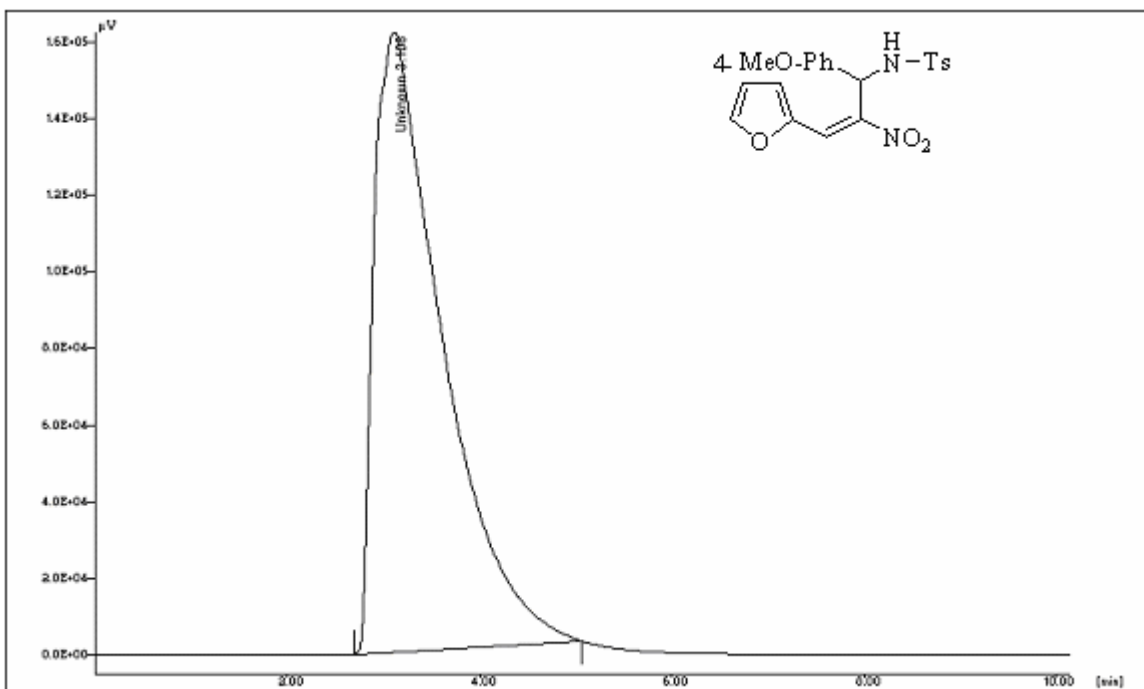

File name: NR-142

Info:

Sample: Aza-MBH

Gradient: 90:10 MeCN/H<sub>2</sub>O

Wavelength: 355 nm

Flow rate: 1 ml/min

Vial # = 1 Rack # = 1

X Units: [min] Y Units:  $\mu$ V

Acquisition Time: 10.15 [min]

Control Method:

Code of system chromatographic: JASCO HPLC

| # | Name      | RT    | Area [ $\mu$ V.Sec] | % Area  |
|---|-----------|-------|---------------------|---------|
| 1 | <b>3b</b> | 3.108 | 7830377.500         | 100.000 |

Total Area of Peak = 7830377.500 [ $\mu$ V.Sec]

Injection Volume = 20.00  $\mu$ l

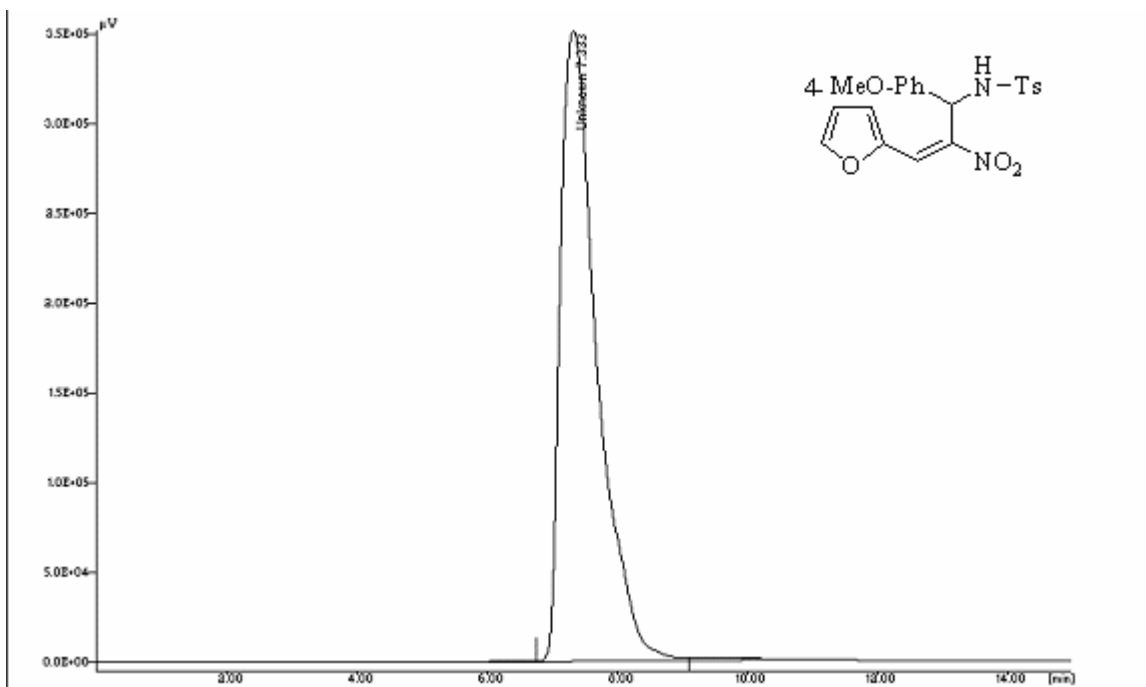

File name: NR-142

Info:

Sample: Aza-MBH

Gradient: 40:60 MeOH/H<sub>2</sub>O

Wavelength: 355 nm

Flow rate: 0.5 ml/min

X Units: [min] Y Units:  $\mu\text{V}$

Acquisition Time: 15.00 [min]

Control Method:

Code of system chromatographic: JASCO HPLC

| # | Name      | RT    | Area [ $\mu\text{V}\cdot\text{Sec}$ ] | % Area  |
|---|-----------|-------|---------------------------------------|---------|
| 1 | <b>3b</b> | 7.333 | 13207397.658                          | 100.000 |

Total Area of Peak = 13207397.658 [ $\mu\text{V}\cdot\text{Sec}$ ]

Injection Volume = 20.00  $\mu\text{l}$

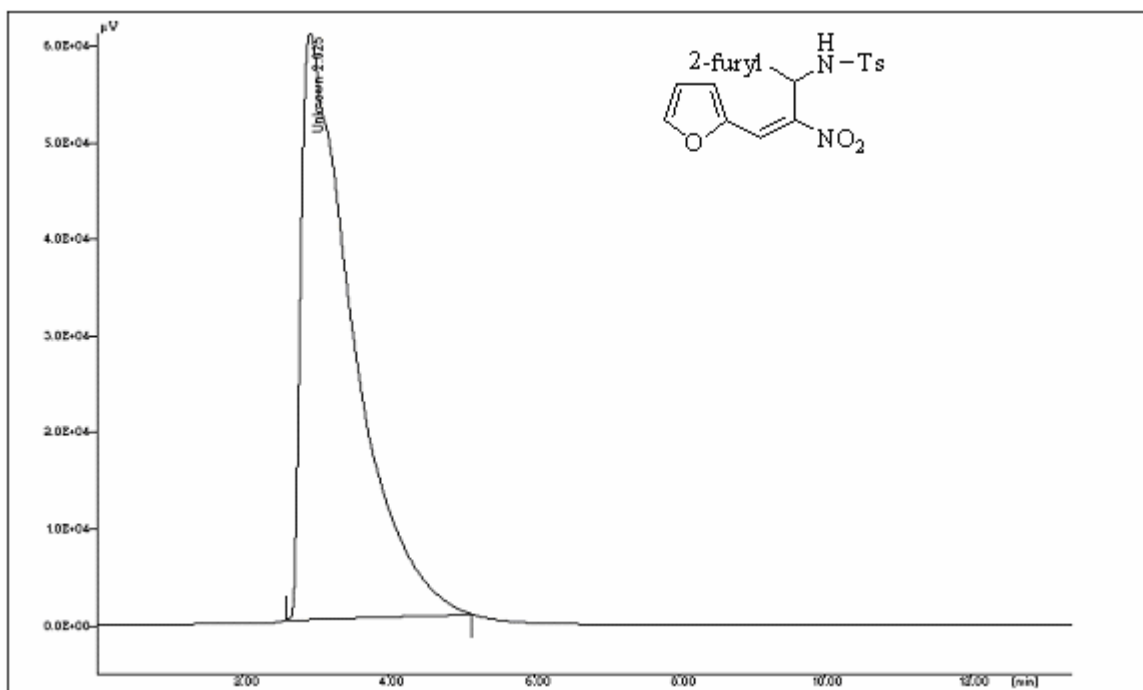

File name: NR-162

Info:

Sample: Aza-MBH

Gradient: 90:10 MeCN/H<sub>2</sub>O

Wavelength: 355 nm

Flow rate: 1 ml/min

Vial # = 1 Rack # = 1

X Units: [min] Y Units:  $\mu\text{V}$

Acquisition Time: 13.40 [min]

Control Method:

Code of system chromatographic: JASCO HPLC

| # | Name      | RT    | Area [ $\mu\text{V}\cdot\text{Sec}$ ] | % Area  |
|---|-----------|-------|---------------------------------------|---------|
| 1 | <b>3c</b> | 2.925 | 2892594.750                           | 100.000 |

Total Area of Peak = 2892594.750 [ $\mu\text{V}\cdot\text{Sec}$ ]

Injection Volume = 20.00  $\mu\text{l}$

Injection Volume = 20.00  $\mu$ l

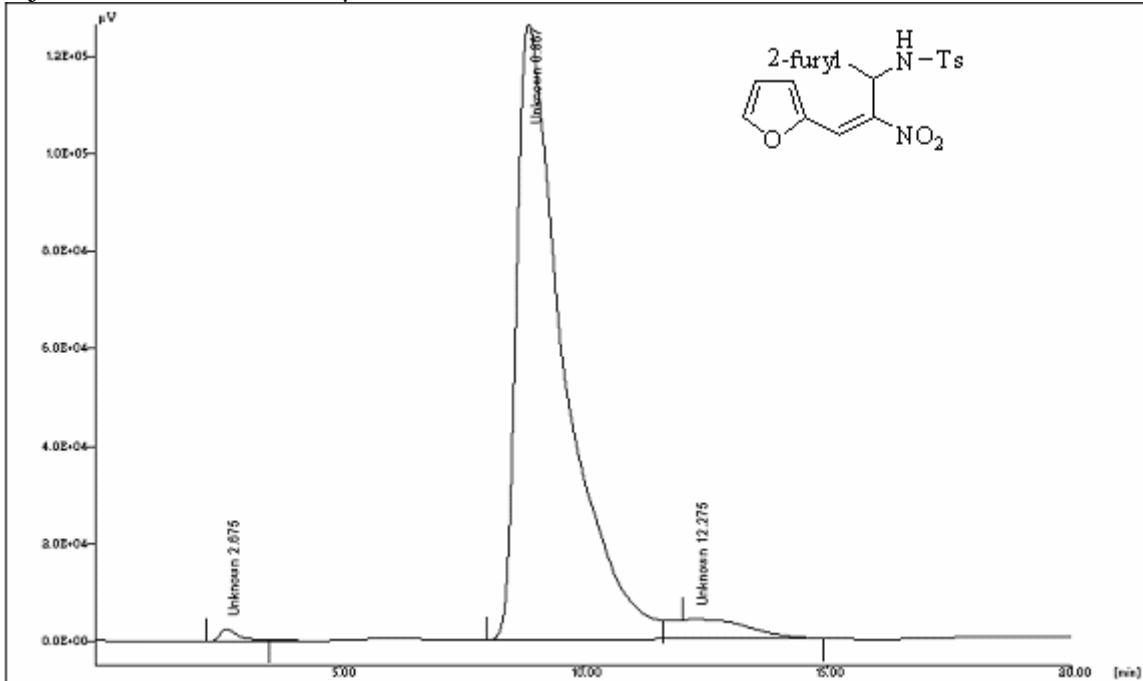

File name: NR-162

Info:

Sample: Aza-MBH

Gradient: 40:60 MeOH/H<sub>2</sub>O

Wavelength: 355 nm

Flow rate: 0.5 ml/min

X Units: [min] Y Units:  $\mu$ V

Acquisition Time: 20.00 [min]

Control Method:

Code of system chromatographic: JASCO HPLC

| # | Name      | RT     | Area [ $\mu$ V.Sec] | % Area |
|---|-----------|--------|---------------------|--------|
| 1 |           | 2.675  | 63498.571           | 0.727  |
| 2 | <b>3c</b> | 8.867  | 8311510.735         | 95.110 |
| 3 |           | 12.275 | 363830.333          | 4.163  |

Total Area of Peak = 8738839.639 [ $\mu$ V.Sec]

Injection Volume = 20.00  $\mu$ l



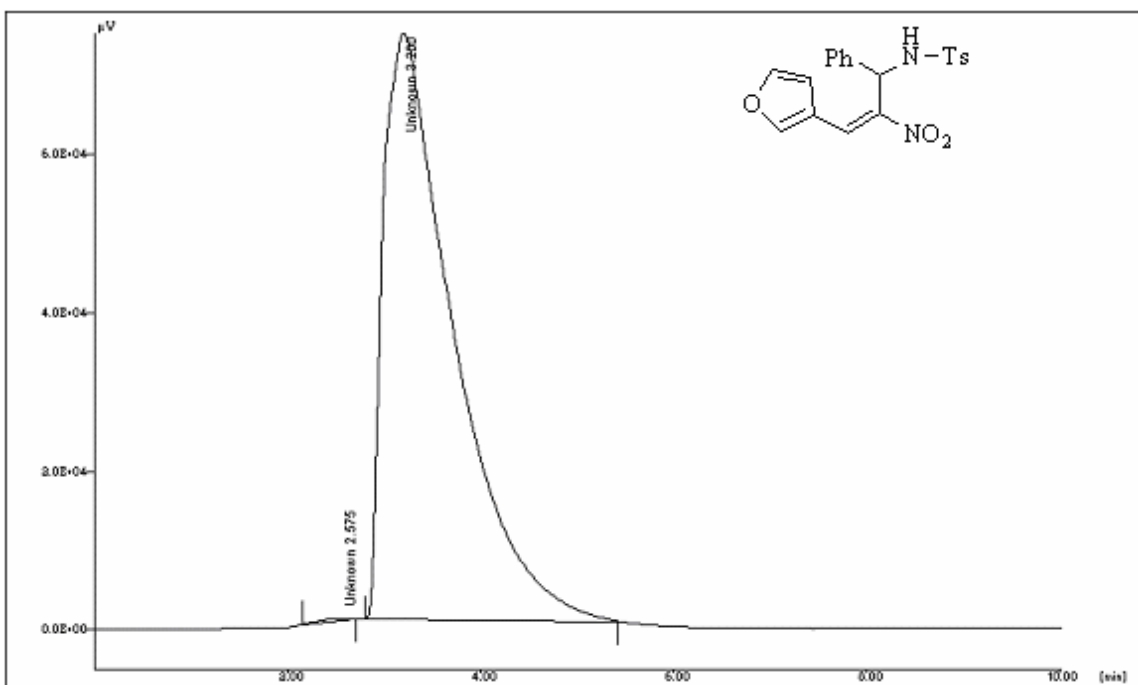

File name: NR-176

Info:

Sample: Aza-MBH

Gradient: 90:10 MeCN/H<sub>2</sub>O

Wavelength: 355 nm

Flow rate: 1 ml/min

Vial # = 1 Rack # = 1

X Units: [min] Y Units: μV

Acquisition Time: 10.03 [min]

Control Method:

Code of system chromatographic: JASCO HPLC

| # | Name      | RT    | Area [μV.Sec] | % Area |
|---|-----------|-------|---------------|--------|
| 1 |           | 2.575 | 6215.000      | 0.169  |
| 2 | <b>3d</b> | 3.200 | 3662570.000   | 99.831 |

Total Area of Peak = 3668785.000 [μV.Sec]

Injection Volume = 20.00 μl

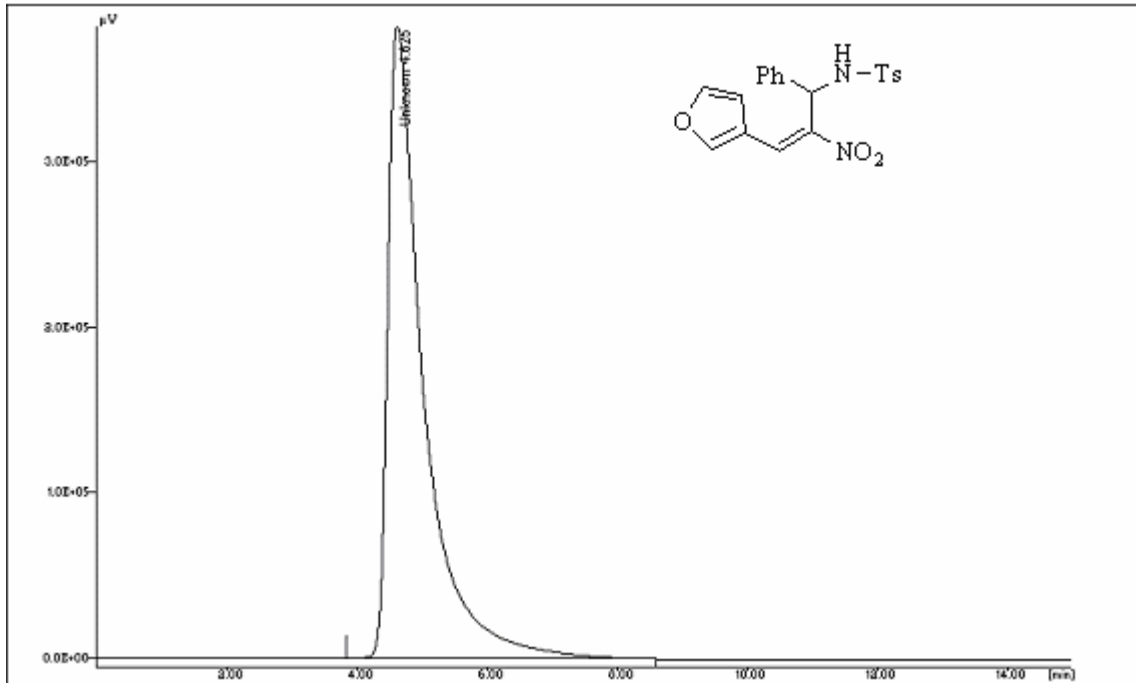

File name: NR-176

Info:

Sample: Aza-MBH

Gradient: 40:60 MeOH/H<sub>2</sub>O

Wavelength: 355 nm

Flow rate: 0.5 ml/min

X Units: [min] Y Units:  $\mu$ V

Acquisition Time: 15.00 [min]

Control Method:

Code of system chromatographic: JASCO HPLC

| # | Name      | RT    | Area [ $\mu$ V.Sec] | % Area  |
|---|-----------|-------|---------------------|---------|
| 1 | <b>3d</b> | 4.625 | 14076723.250        | 100.000 |

Total Area of Peak = 14076723.250 [ $\mu$ V.Sec]

Injection Volume = 20.00  $\mu$ l

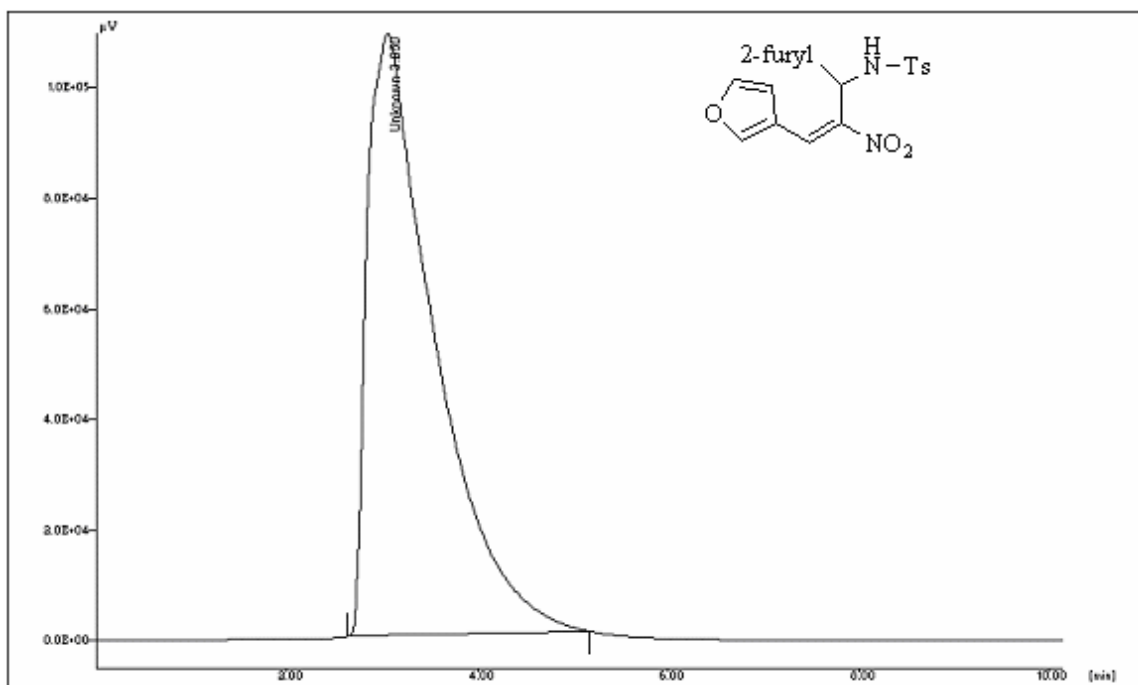

File name: NR-184

Info:

Sample: Aza-MBH

Gradient: 90:10 MeCN/H2O

Wavelength: 355 nm

Flow rate: 1 ml/min

Vial # = 1 Rack # = 1

X Units: [min] Y Units:  $\mu\text{V}$

Acquisition Time: 10.15 [min]

Control Method:

Code of system chromatographic: JASCO HPLC

| # | Name      | RT    | Area [ $\mu\text{V}\cdot\text{Sec}$ ] | % Area  |
|---|-----------|-------|---------------------------------------|---------|
| 1 | <b>3e</b> | 3.050 | 5250335.500                           | 100.000 |

Total Area of Peak = 5250335.500 [ $\mu\text{V}\cdot\text{Sec}$ ]

Injection Volume = 20.00  $\mu\text{l}$

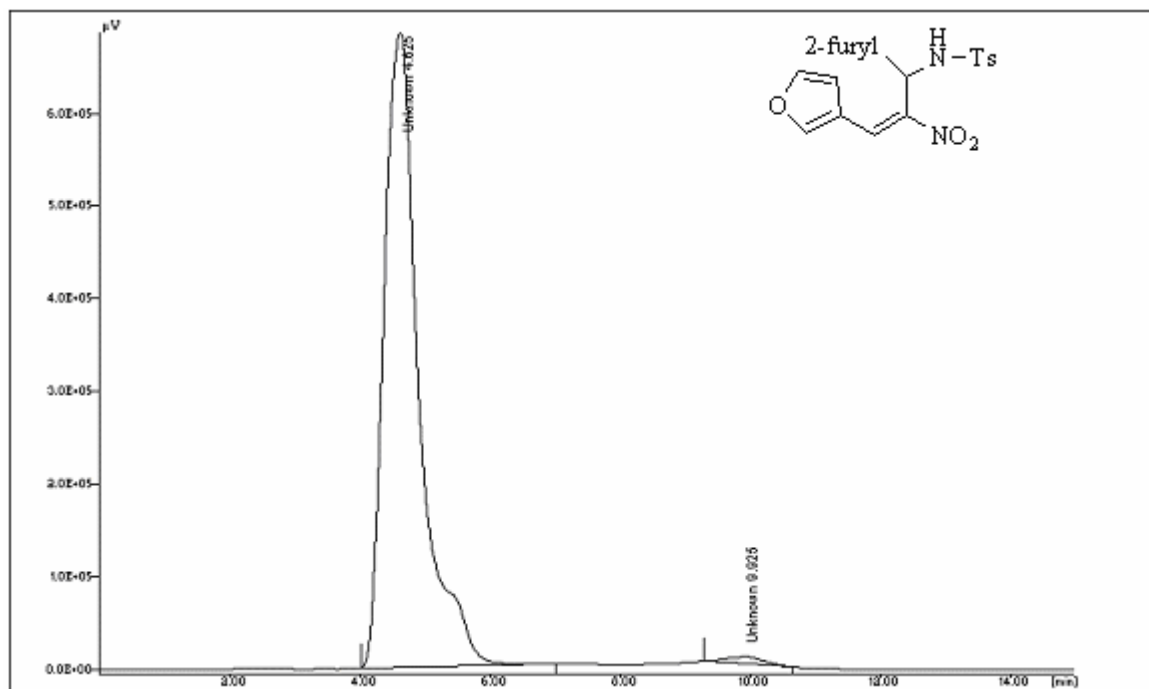

File name: NR-184

Info:

Sample: Aza-MBH

Gradient: 40:60 MeOH/H2O

Wavelength: 355 nm

Flow rate: 0.5 ml/min

X Units: [min] Y Units:  $\mu\text{V}$

Acquisition Time: 15.00 [min]

Control Method:

Code of system chromatographic: JASCO HPLC

| # | Name      | RT    | Area [ $\mu\text{V}.\text{Sec}$ ] | % Area |
|---|-----------|-------|-----------------------------------|--------|
| 1 | <b>3e</b> | 4.625 | 24651739.000                      | 98.840 |
| 2 |           | 9.925 | 289343.750                        | 1.160  |

Total Area of Peak = 24941082.750 [ $\mu\text{V}.\text{Sec}$ ]

Injection Volume = 20.00  $\mu\text{l}$

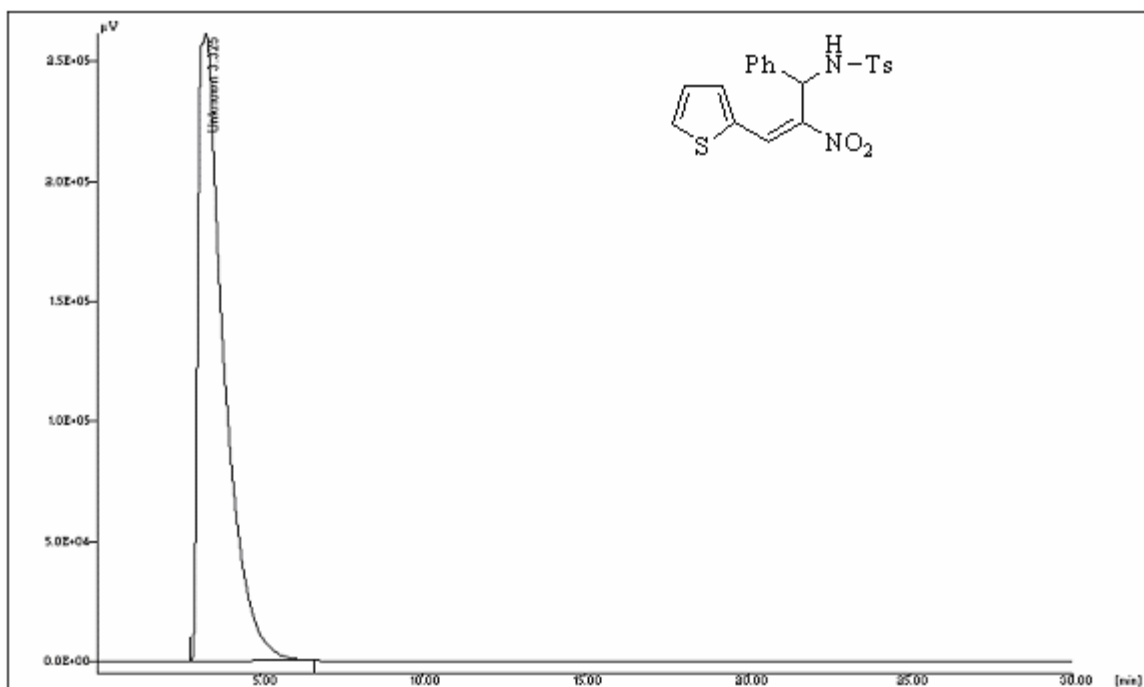

File name: NR-178

Info:

Sample: Aza-MBH

Gradient: 90:10 MeCN/H2O

Wavelength: 355 nm

Flow rate: 1 ml/min

Vial # = 1 Rack # = 1

X Units: [min] Y Units:  $\mu\text{V}$

Acquisition Time: 30.00 [min]

Control Method:

Code of system chromatographic: JASCO HPLC

| # | Name      | RT    | Area [ $\mu\text{V}\cdot\text{Sec}$ ] | % Area  |
|---|-----------|-------|---------------------------------------|---------|
| 1 | <b>3f</b> | 3.325 | 13673017.750                          | 100.000 |

Total Area of Peak = 13673017.750 [ $\mu\text{V}\cdot\text{Sec}$ ]

Injection Volume = 20.00  $\mu\text{l}$

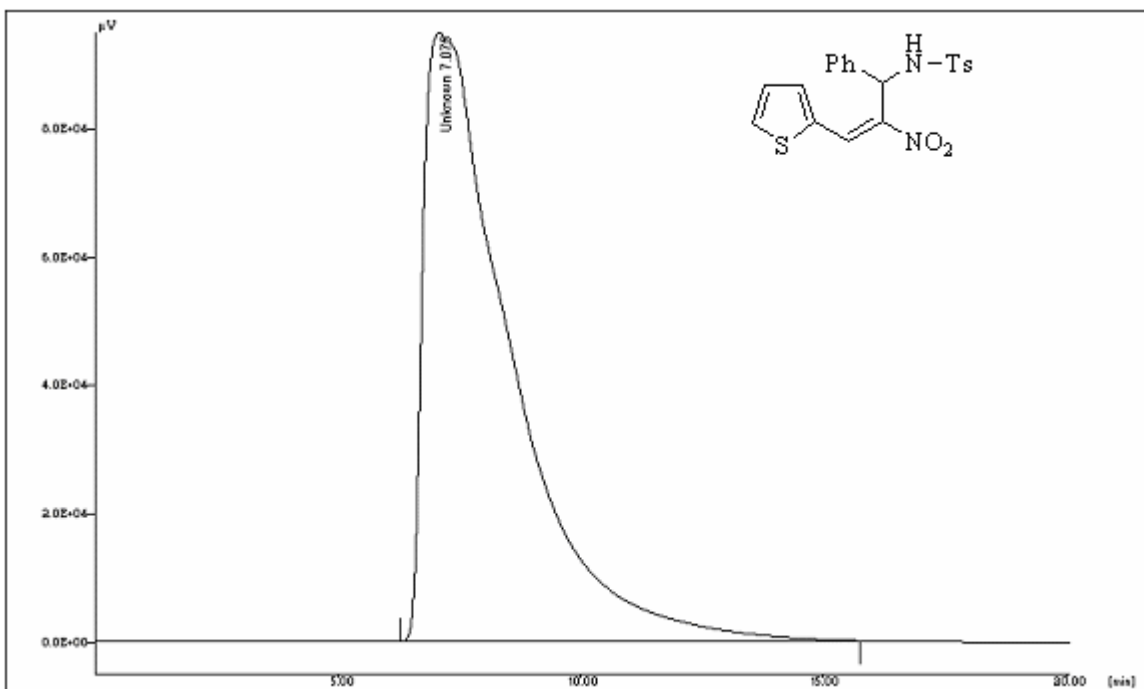

File name: NR-178

Info:

Sample: Aza-MBH

Gradient: 40:60 MeOH/H<sub>2</sub>O

Wavelength: 355 nm

Flow rate: 0.5 ml/min

X Units: [min] Y Units:  $\mu\text{V}$

Acquisition Time: 20.10 [min]

Control Method:

Code of system chromatographic: JASCO HPLC

| # | Name      | RT    | Area [ $\mu\text{V}.\text{Sec}$ ] | % Area  |
|---|-----------|-------|-----------------------------------|---------|
| 1 | <b>3f</b> | 7.075 | 11686434.500                      | 100.000 |

Total Area of Peak = 11686434.500 [ $\mu\text{V}.\text{Sec}$ ]

Injection Volume = 20.00  $\mu\text{l}$

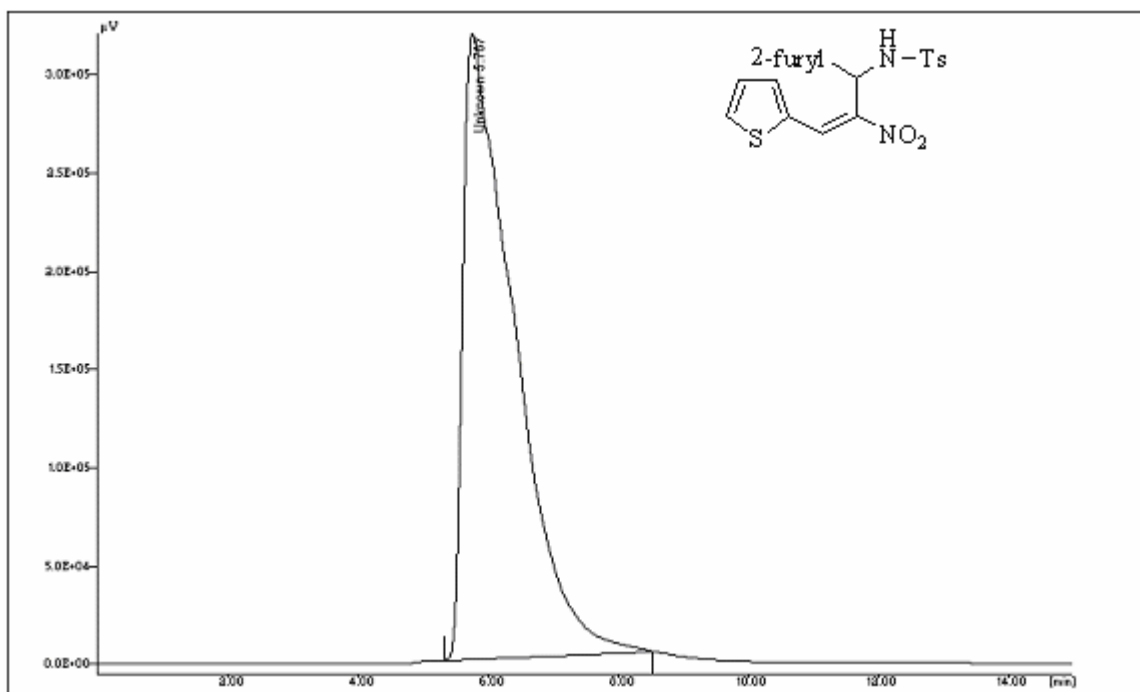

File name: NR-180

Info:

Sample: Aza-MBH

Gradient: 90:10 MeCN/H<sub>2</sub>O

Wavelength: 355 nm

Flow rate: 1 ml/min

Vial # = 1 Rack # = 1

X Units: [min] Y Units: μV

Acquisition Time: 15.00 [min]

Control Method:

Code of system chromatographic: JASCO HPLC

| # | Name      | RT    | Area [μV.Sec] | % Area  |
|---|-----------|-------|---------------|---------|
| 1 | <b>3g</b> | 5.767 | 16969436.750  | 100.000 |

Total Area of Peak = 16969436.750 [μV.Sec]

Injection Volume = 20.00 μl

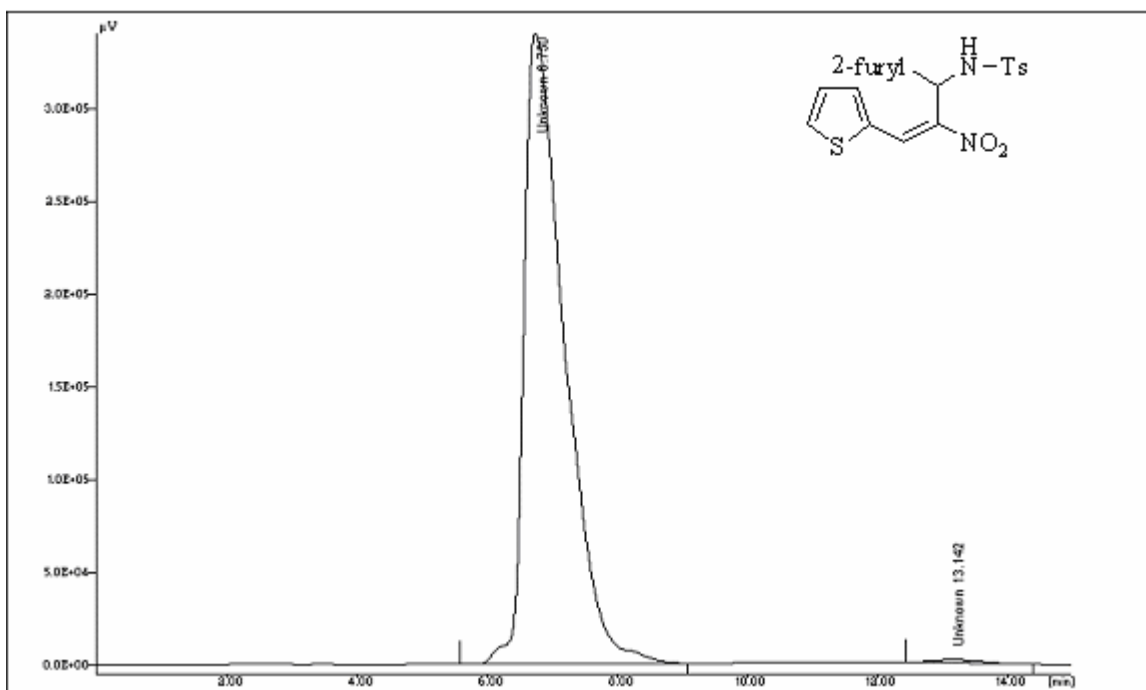

File name: NR-180

Info:

Sample: Aza-MBH

Gradient: 40:60 MeOH/H<sub>2</sub>O

Wavelength: 355 nm

Flow rate: 0.5 ml/min

X Units: [min] Y Units:  $\mu\text{V}$

Acquisition Time: 15.00 [min]

Control Method:

Code of system chromatographic: JASCO HPLC

| # | Name      | RT     | Area [ $\mu\text{V}\cdot\text{Sec}$ ] | % Area |
|---|-----------|--------|---------------------------------------|--------|
| 1 | <b>3g</b> | 6.750  | 14282963.750                          | 99.304 |
| 2 |           | 13.142 | 100061.407                            | 0.696  |

Total Area of Peak = 14383025.157 [ $\mu\text{V}\cdot\text{Sec}$ ]

Injection Volume = 20.00  $\mu\text{l}$



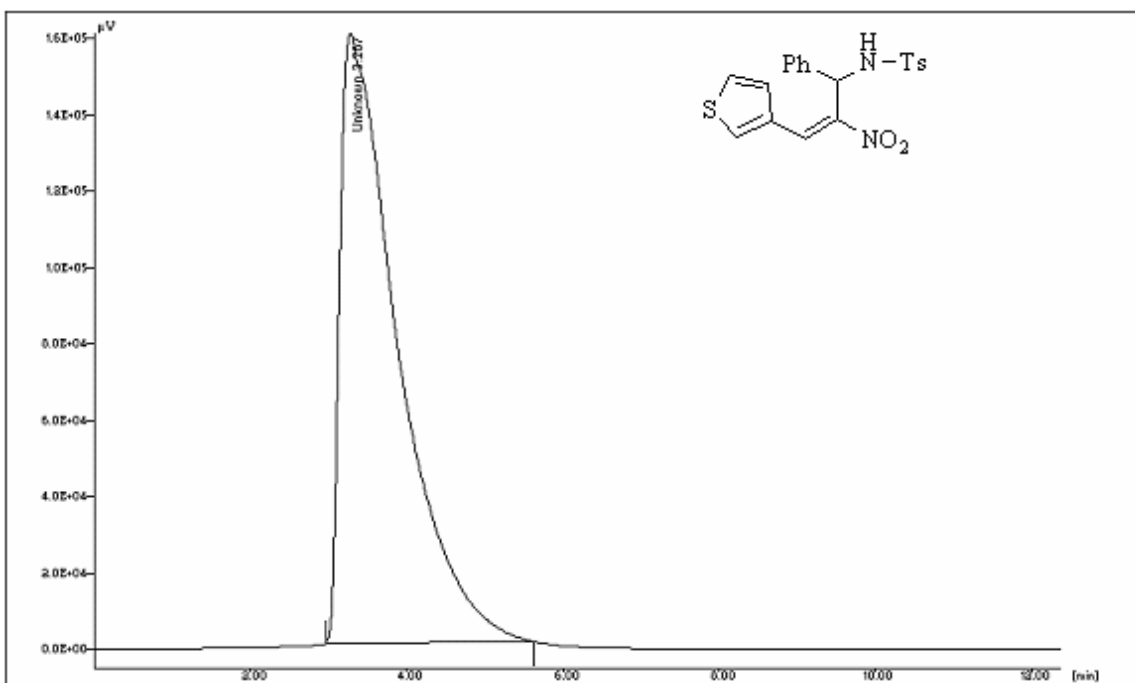

File name: NR-179

Info:

Sample: Aza-MBH

Gradient: 90:10 MeCN/H<sub>2</sub>O

Wavelength: 355 nm

Flow rate: 1 ml/min

Vial # = 1 Rack # = 1

X Units: [min] Y Units:  $\mu$ V

Acquisition Time: 12.38 [min]

Control Method:

Code of system chromatographic: JASCO HPLC

| # | Name      | RT    | Area [ $\mu$ V.Sec] | % Area  |
|---|-----------|-------|---------------------|---------|
| 1 | <b>3h</b> | 3.267 | 7998569.250         | 100.000 |

Total Area of Peak = 7998569.250 [ $\mu$ V.Sec]

Injection Volume = 20.00  $\mu$ l

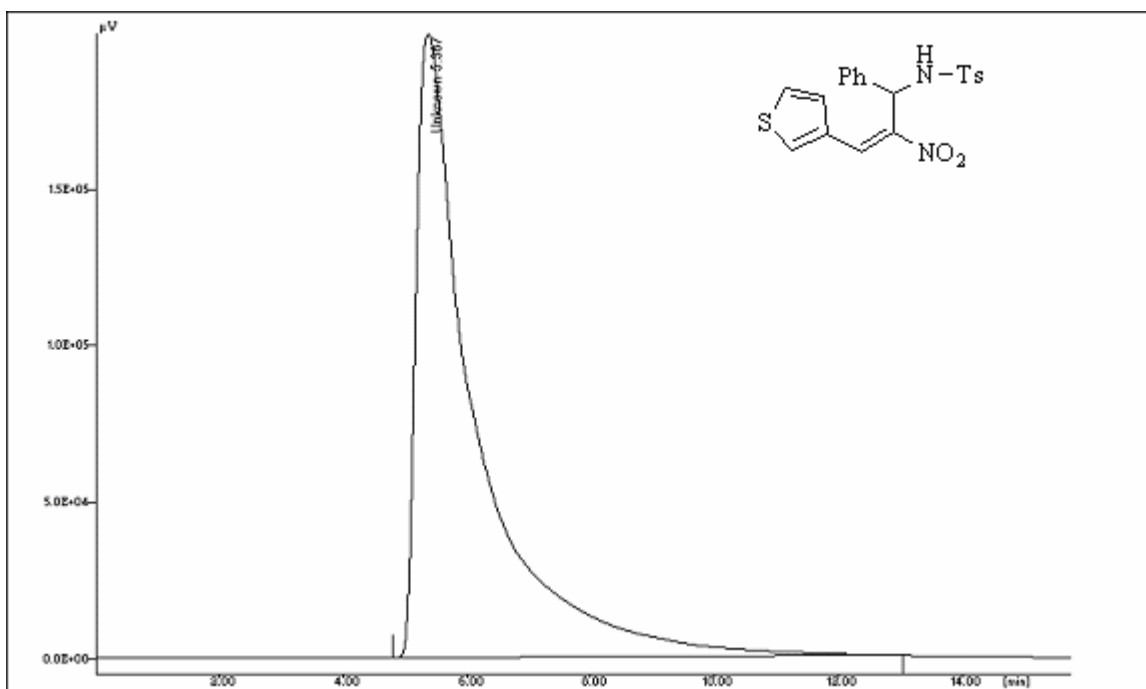

File name: NR-179

Info:

Sample: Aza-MBH

Gradient: 40:60 MeOH/H<sub>2</sub>O

Wavelength: 355 nm

Flow rate: 0.5 ml/min

X Units: [min] Y Units:  $\mu\text{V}$

Acquisition Time: 15.77 [min]

Control Method:

Code of system chromatographic: JASCO HPLC

| # | Name      | RT    | Area [ $\mu\text{V}.\text{Sec}$ ] | % Area  |
|---|-----------|-------|-----------------------------------|---------|
| 1 | <b>3h</b> | 5.367 | 13003129.500                      | 100.000 |

Total Area of Peak = 13003129.500 [ $\mu\text{V}.\text{Sec}$ ]

Injection Volume = 20.00  $\mu\text{l}$

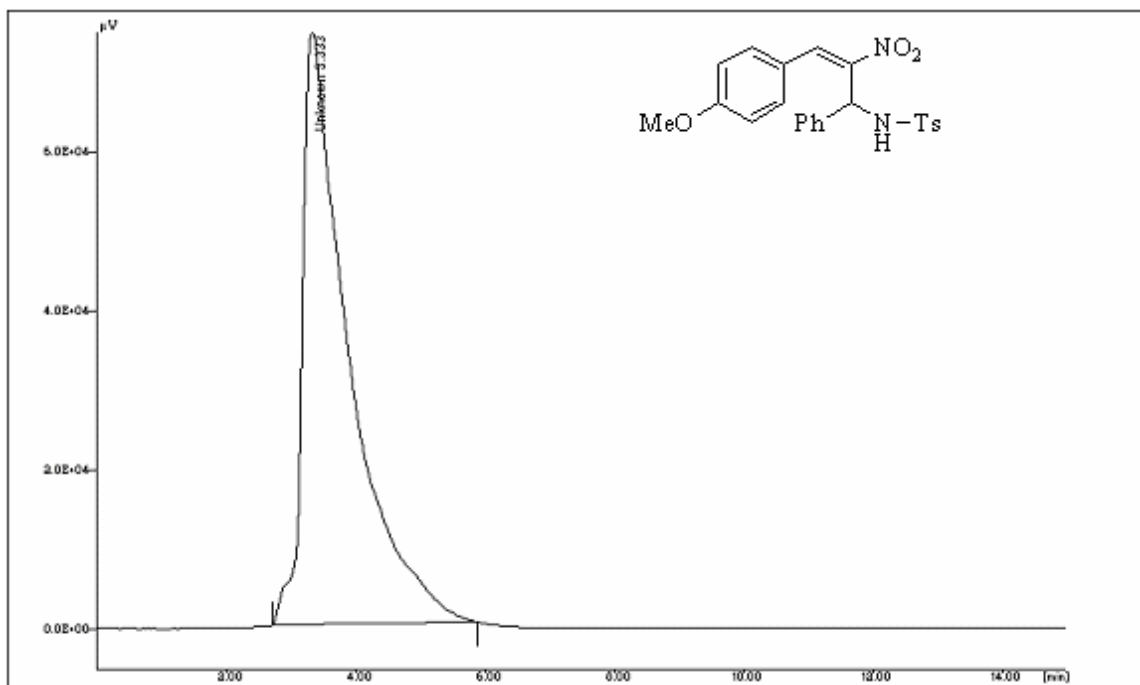

File name: NR-165

Info:

Sample: Aza-MBH

Gradient: 90:10 MeCN/H2O

Wavelength: 355 nm

Flow rate: 1 ml/min

Vial # = 1 Rack # = 1

X Units: [min] Y Units:  $\mu$ V

Acquisition Time: 15.00 [min]

Control Method:

Code of system chromatographic: JASCO HPLC

| # | Name      | RT    | Area [ $\mu$ V.Sec] | % Area  |
|---|-----------|-------|---------------------|---------|
| 1 | <b>3i</b> | 3.333 | 3603709.250         | 100.000 |

Total Area of Peak = 3603709.250 [ $\mu$ V.Sec]

Injection Volume = 20.00  $\mu$ l

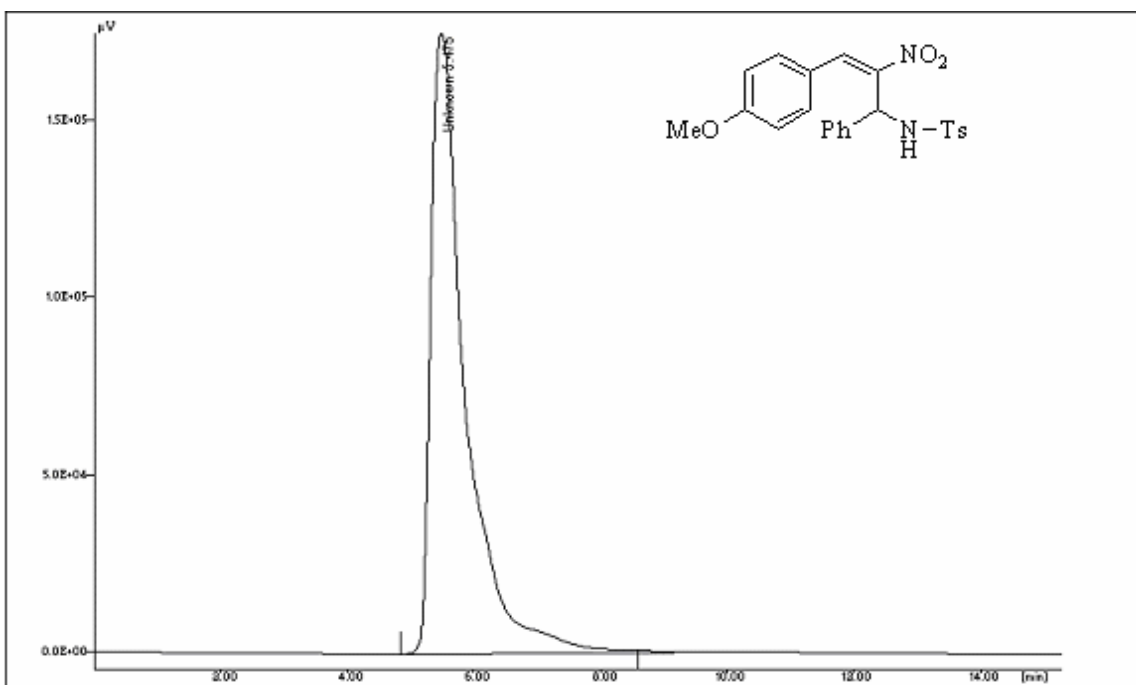

File name: NR-165

Info:

Sample: Aza-MBH

Gradient: 40:60 MeOH/H<sub>2</sub>O

Wavelength: 355 nm

Flow rate: 0.5 ml/min

X Units: [min] Y Units:  $\mu$ V

Acquisition Time: 15.30 [min]

Control Method:

Code of system chromatographic: JASCO HPLC

| # | Name      | RT    | Area [ $\mu$ V.Sec] | % Area  |
|---|-----------|-------|---------------------|---------|
| 1 | <b>3i</b> | 5.475 | 6415787.786         | 100.000 |

Total Area of Peak = 6415787.786 [ $\mu$ V.Sec]

Injection Volume = 20.00  $\mu$ l

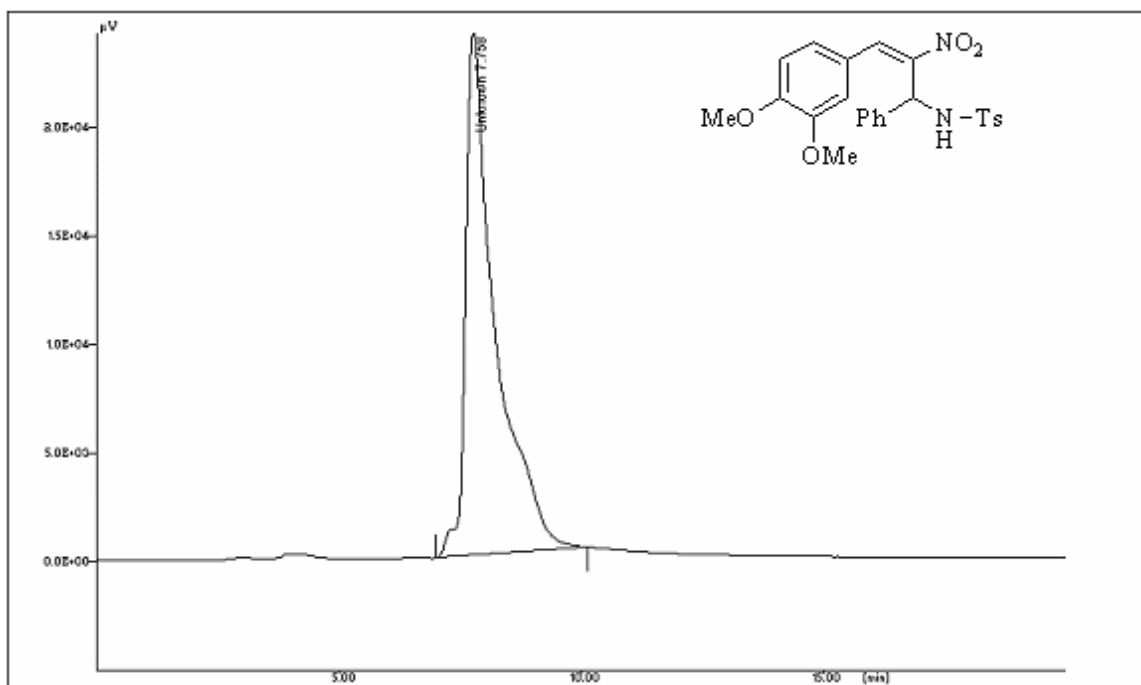

File name: NR-175

Info:

Sample: Aza-MBH

Gradient: 90:10 MeCN/H<sub>2</sub>O

Wavelength: 355 nm

Flow rate: 1 ml/min

Vial # = 1 Rack # = 1

X Units: [min] Y Units: μV

Acquisition Time: 19.99 [min]

Control Method:

Code of system chromatographic: JASCO HPLC

| # | Name      | RT    | Area [μV.Sec] | % Area  |
|---|-----------|-------|---------------|---------|
| 1 | <b>3j</b> | 7.758 | 996629.324    | 100.000 |

Total Area of Peak = 996629.324 [μV.Sec]

Injection Volume = 20.00 μl

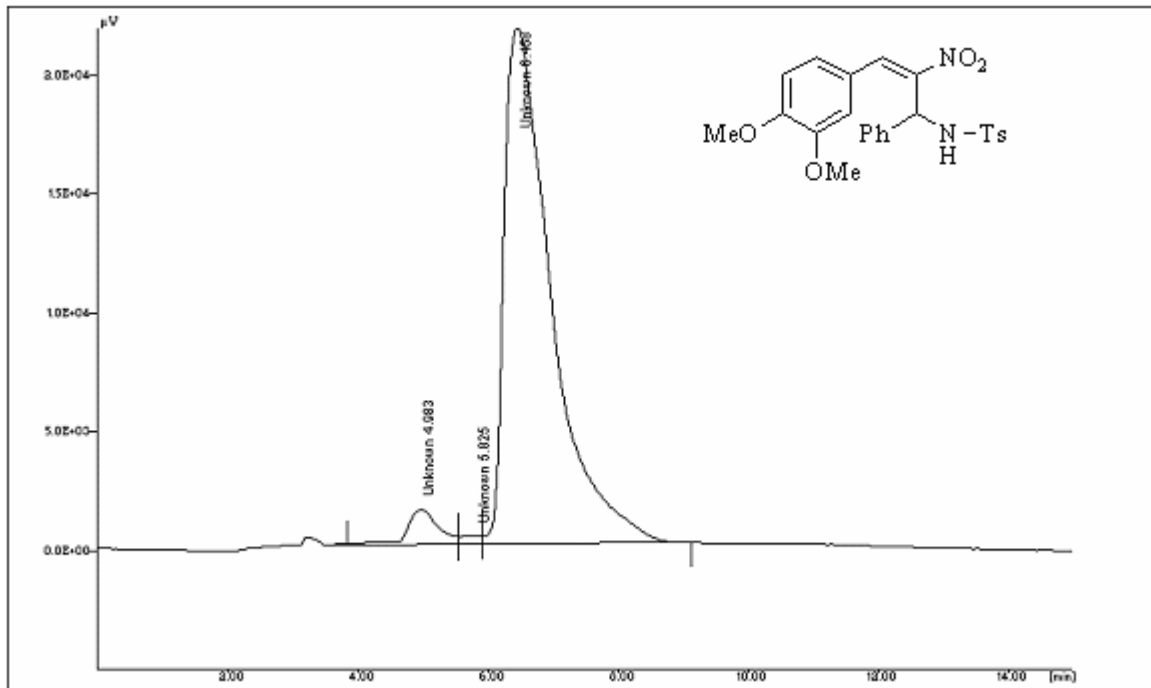

File name: NR-175

Info:

Sample: Aza-MBH

Gradient: 40:60 MeOH/H<sub>2</sub>O

Wavelength: 355 nm

Flow rate: 0.5 ml/min

X Units: [min] Y Units:  $\mu V$

Acquisition Time: 15.00 [min]

Control Method:

Code of system chromatographic: JASCO HPLC

| # | Name      | RT    | Area [ $\mu V \cdot Sec$ ] | % Area |
|---|-----------|-------|----------------------------|--------|
| 1 |           | 4.983 | 46195.472                  | 4.148  |
| 2 |           | 5.825 | 7312.233                   | 0.657  |
| 3 | <b>3j</b> | 6.458 | 1060304.247                | 95.196 |

Total Area of Peak = 1113811.952 [ $\mu V \cdot Sec$ ]

Injection Volume = 20.00  $\mu l$

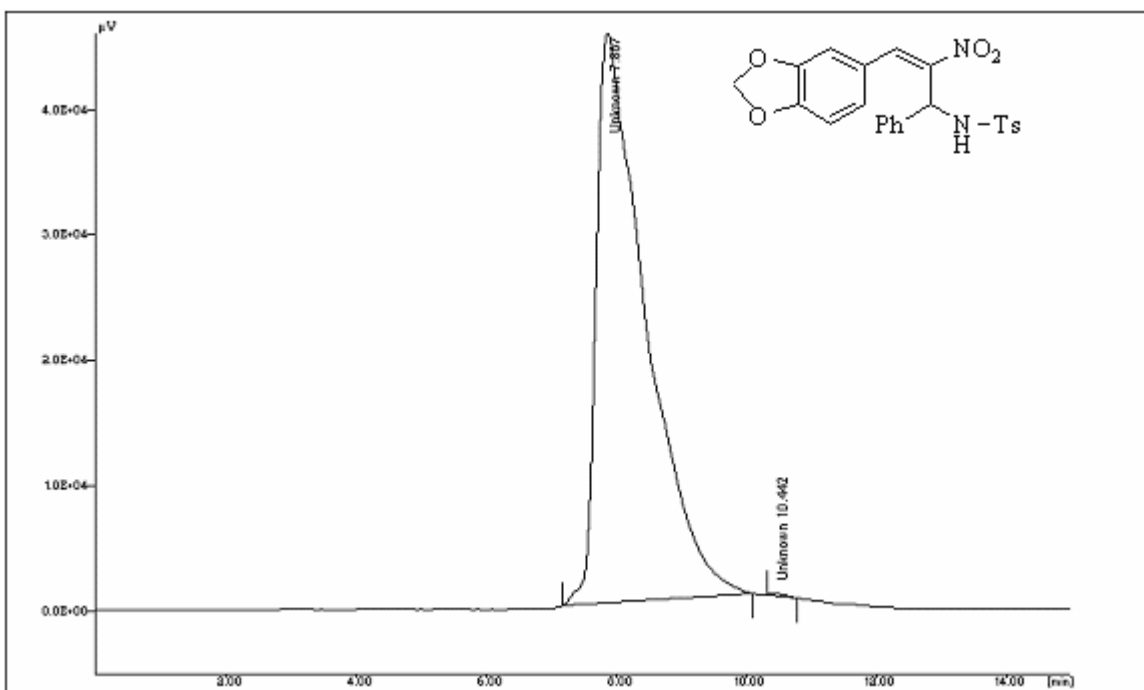

File name: NR-177

Info:

Sample: Aza-MBH

Gradient: 90:10 MeCN/H<sub>2</sub>O

Wavelength: 355 nm

Flow rate: 1 ml/min

Vial # = 1 Rack # = 1

X Units: [min] Y Units:  $\mu\text{V}$

Acquisition Time: 10.15 [min]

Control Method:

Code of system chromatographic: JASCO HPLC

| # | Name      | RT     | Area [ $\mu\text{V}.\text{Sec}$ ] | % Area |
|---|-----------|--------|-----------------------------------|--------|
| 1 | <b>3k</b> | 7.867  | 2346177.750                       | 99.913 |
| 2 |           | 10.442 | 2043.500                          | 0.087  |

Total Area of Peak = 2348221.250 [ $\mu\text{V}.\text{Sec}$ ]

Injection Volume = 20.00  $\mu\text{l}$

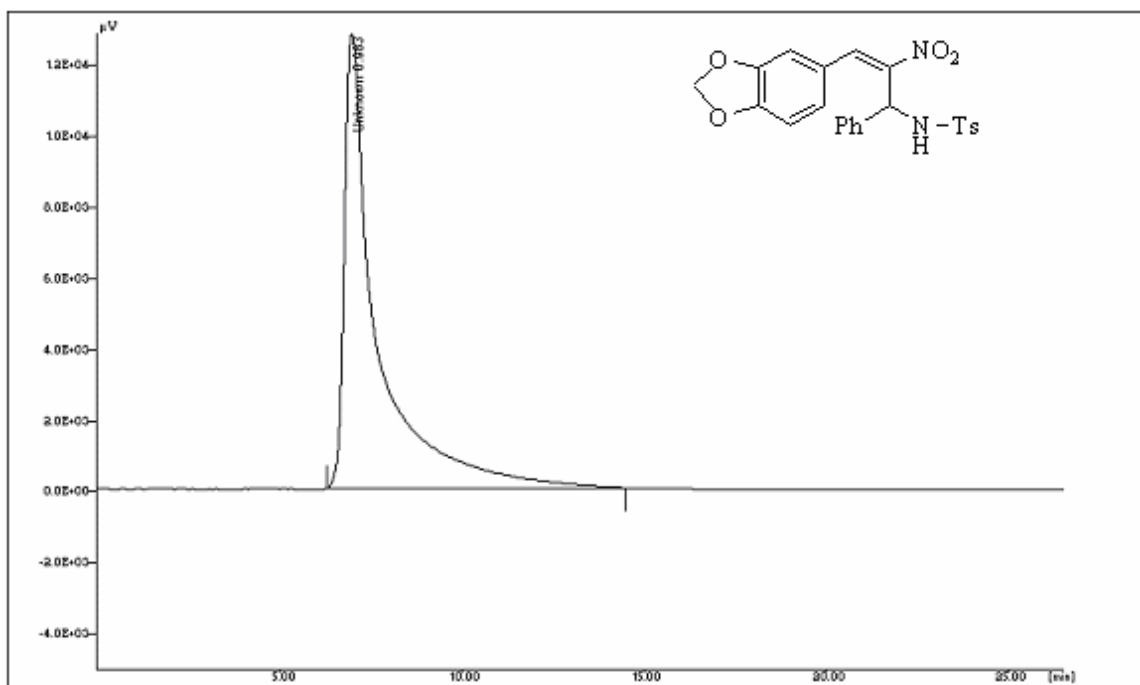

File name: NR-177

Info:

Sample: Aza-MBH

Gradient: 40:60 MeOH/H2O

Wavelength: 355 nm

Flow rate: 0.5 ml/min

X Units: [min] Y Units:  $\mu\text{V}$

Acquisition Time: 26.53 [min]

Control Method:

Code of system chromatographic: JASCO HPLC

| # | Name      | RT    | Area [ $\mu\text{V}\cdot\text{Sec}$ ] | % Area  |
|---|-----------|-------|---------------------------------------|---------|
| 1 | <b>3k</b> | 6.983 | 777680.000                            | 100.000 |

Total Area of Peak = 777680.000 [ $\mu\text{V}\cdot\text{Sec}$ ]

Injection Volume = 20.00  $\mu\text{l}$
