# Supplementary material for: Synthesis and anticancer activity studies of α-aminoalkylated conjugated nitroalkenes
Source: Royal Society of Chemistry journal article supplement (doi:10.1039/b607537a), 2006-01-01
Supplement: b607537a_3.pdf [file b607537a_3.pdf]

Copies of NMR Spectra  
For

**Synthesis and anticancer activity studies of  $\alpha$ -aminoalkylated conjugated nitroalkenes**

Namrata Rastogi, Renu Mohan, Dulal Panda,\* Shaikh Mobin, Irishi N. N. Namboothiri\*

**Table of Contents**

|                                                                         | Page |
|-------------------------------------------------------------------------|------|
| 1 Figure S1. <sup>1</sup> H NMR Spectrum of <b>3a</b>                   | 3    |
| 2 Figure S2. <sup>13</sup> C NMR Spectrum of <b>3a</b>                  | 4    |
| 3 Figure S3. <sup>1</sup> H- <sup>1</sup> H NOESY Spectrum of <b>3a</b> | 5    |
| 4 Figure S4. <sup>1</sup> H- <sup>1</sup> H COSY Spectrum of <b>3a</b>  | 6    |
| 5 Figure S5. <sup>1</sup> H NMR Spectrum of <b>3b</b>                   | 7    |
| 6 Figure S6. <sup>13</sup> C NMR Spectrum of <b>3b</b>                  | 8    |
| 7 Figure S7. <sup>13</sup> C NMR Spectrum of <b>3b</b> (Expansion)      | 9    |
| 8 Figure S8. <sup>1</sup> H NMR Spectrum of <b>3c</b>                   | 10   |
| 9 Figure S9. <sup>13</sup> C NMR Spectrum of <b>3c</b>                  | 11   |
| 10 Figure S10. <sup>1</sup> H NMR Spectrum of <b>3d</b>                 | 12   |
| 11 Figure S11. <sup>13</sup> C NMR Spectrum of <b>3d</b>                | 13   |
| 12 Figure S12. <sup>13</sup> C NMR Spectrum of <b>3d</b> (Expansion)    | 14   |
| 11 Figure S13. <sup>1</sup> H NMR Spectrum of <b>3e</b>                 | 15   |
| 12 Figure S14. <sup>13</sup> C NMR Spectrum of <b>3e</b>                | 16   |
| 13 Figure S15. <sup>1</sup> H NMR Spectrum of <b>3f</b>                 | 17   |
| 14 Figure S16. <sup>13</sup> C NMR Spectrum of <b>3f</b>                | 18   |
| 15 Figure S17. <sup>1</sup> H NMR Spectrum of <b>3g</b>                 | 19   |
| 16 Figure S18. <sup>13</sup> C NMR Spectrum of <b>3g</b>                | 20   |
| 17 Figure S19. <sup>1</sup> H NMR Spectrum of <b>3h</b>                 | 21   |

---

|    |                                                                   |    |
|----|-------------------------------------------------------------------|----|
| 18 | Figure S20. $^{13}\text{C}$ NMR Spectrum of <b>3h</b>             | 22 |
| 19 | Figure S21. $^1\text{H}$ NMR Spectrum of <b>3i</b>                | 23 |
| 20 | Figure S22. $^{13}\text{C}$ NMR Spectrum of <b>3i</b>             | 24 |
| 21 | Figure S23. $^1\text{H}$ NMR Spectrum of <b>3j</b>                | 25 |
| 22 | Figure S24. $^{13}\text{C}$ NMR Spectrum of <b>3j</b>             | 26 |
| 23 | Figure S25. $^{13}\text{C}$ NMR Spectrum of <b>3j</b> (Expansion) | 27 |
| 24 | Figure S26. $^1\text{H}$ NMR Spectrum of <b>3k</b>                | 28 |
| 25 | Figure S27. $^{13}\text{C}$ NMR Spectrum of <b>3k</b>             | 29 |

---

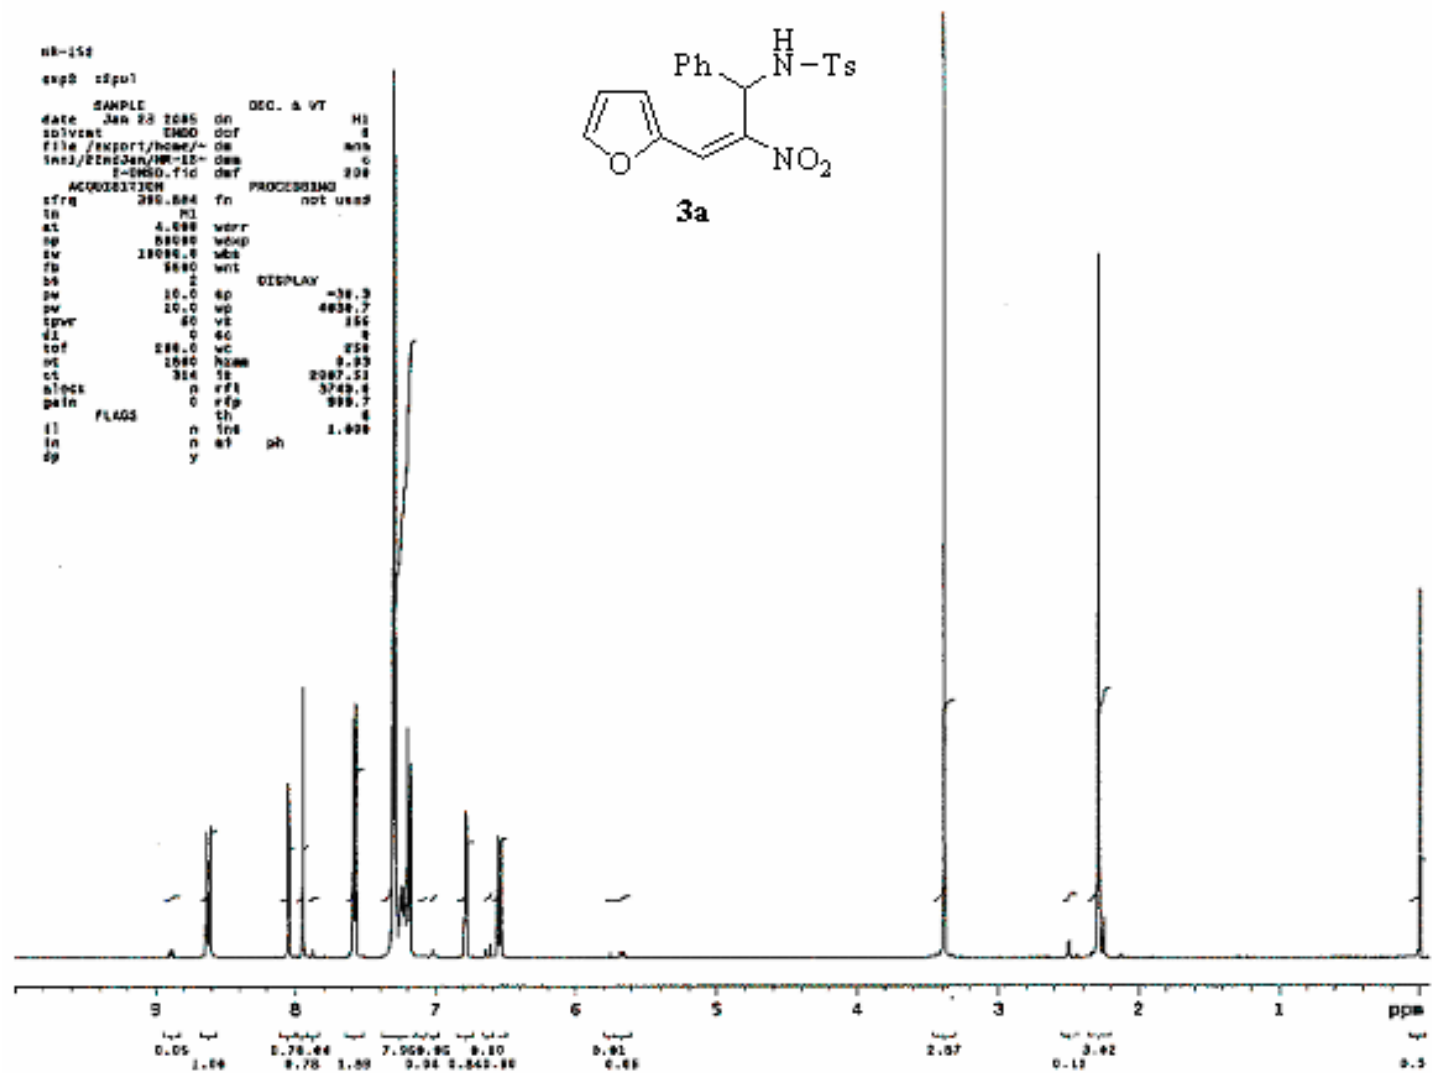

Figure S1. <sup>1</sup>H NMR Spectrum of 3a

NR-152

cp2 CARBON

|                     |             |           |          |
|---------------------|-------------|-----------|----------|
| date                | Jan 31 2005 | temp      | not used |
| solvent             | DMSO        | gain      | not used |
| file /export/ROSA/  |             | spin      | not used |
| quest/internal/24H- |             | hst       | 0.000    |
| -25/31-dm/INM-ME-   |             | pv20      | 14.000   |
| 152-de-C13.fid      |             | alfa      | 20.000   |
| ACQUISITION         |             |           |          |
| sv                  | 25125.6     | fl        | n        |
| as                  | 1.130       | in        | n        |
| sp                  | 40270       | ep        | n        |
| rb                  | 13000       | hs        | y        |
| bc                  | 4           | PROCESSED | on       |
| dl                  | 1.000       | to        | 1.00     |
| nt                  | 2400        | fn        | not used |
| ct                  | 2191        | DISPLAY   |          |
| TRANSMITTER         |             |           |          |
| tn                  | C13         | vg        | -261.7   |
| sfrq                | 100.622     | rft       | 14474.6  |
| tof                 | 1554.3      | rff       | 5020.0   |
| tpwr                | 36          | rp        | 3971.7   |
| pw                  | 7.000       | lp        | -281.6   |
| DECOUPLER           |             |           |          |
| dn                  | H1          | vc        | 250      |
| dof                 | 0           | sc        | 0        |
| dm                  | VVV         | vb        | 121      |
| dms                 | w           | th        | 11       |
| dpwr                | 41          | at        | ph       |
| def                 | 11900       |           |          |

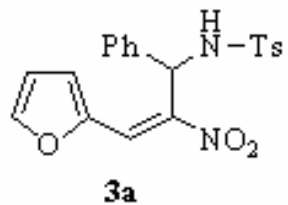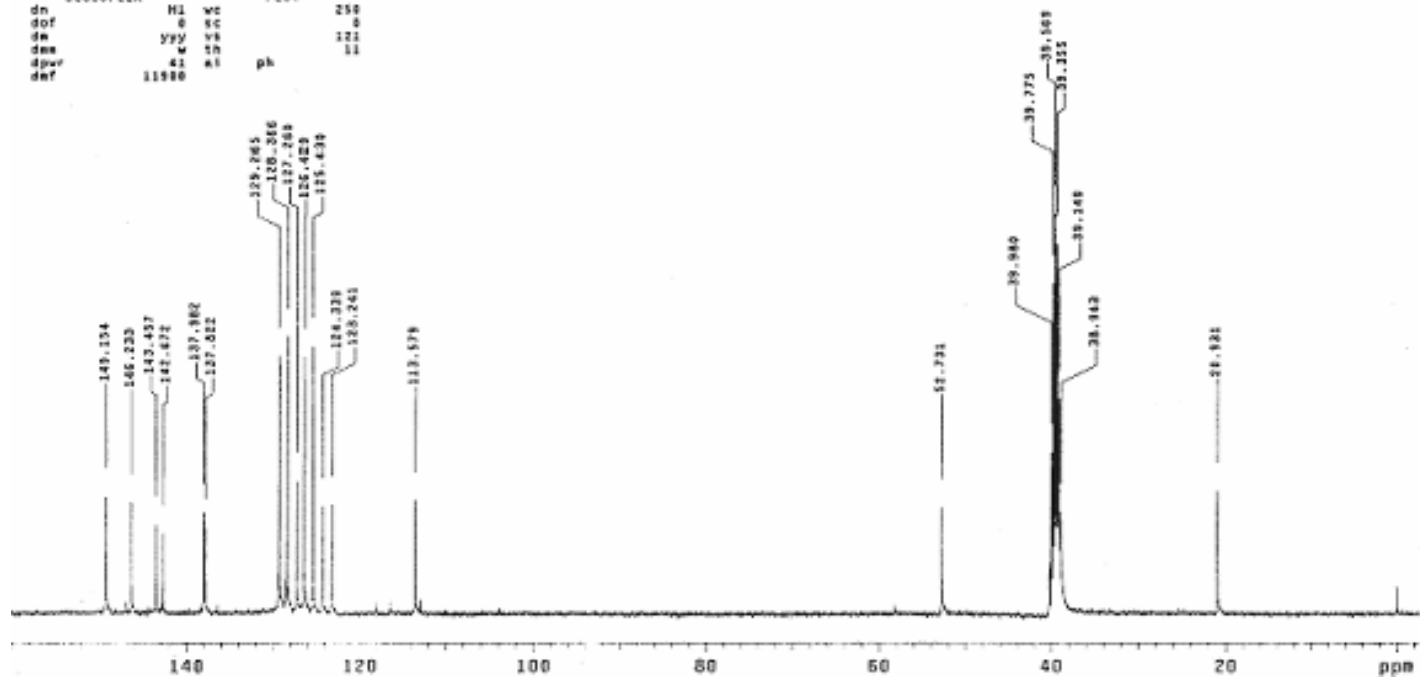

Figure S2. <sup>13</sup>C NMR Spectrum of 3a

4R-152-NOESY

Data Collected on: iitbchemmercury400  
Archive directory: /export/home/iitb/vmr/sys/data  
Sample directory: iitb\_2005-11-16-125524  
File: NOESY

Pulse Sequence: NOESY  
Solvent: DMSO  
Temp: 20.5 C / 293.4 K

Relax. delay 1.098 sec  
Mixing 0.719 sec  
Acq. time 3.150 sec  
Width 4345.5 Hz  
F2 Width 4345.5 Hz  
8 repetitions  
2 x 128 increments  
OBSERVE F1: 399.8821678 MHz  
DATA PROCESSING  
Gauss apodization 0.363 sec  
F1 DATA PROCESSING  
Gauss apodization 0.164 sec  
FT size 2540 x 2540  
Total time 1 hr, 7 min

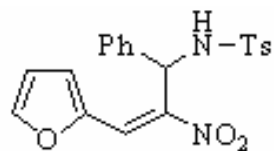

3a

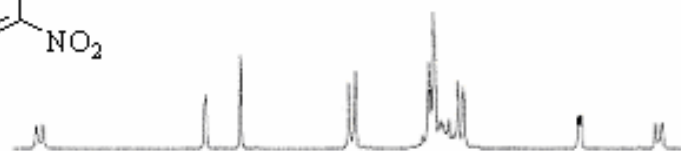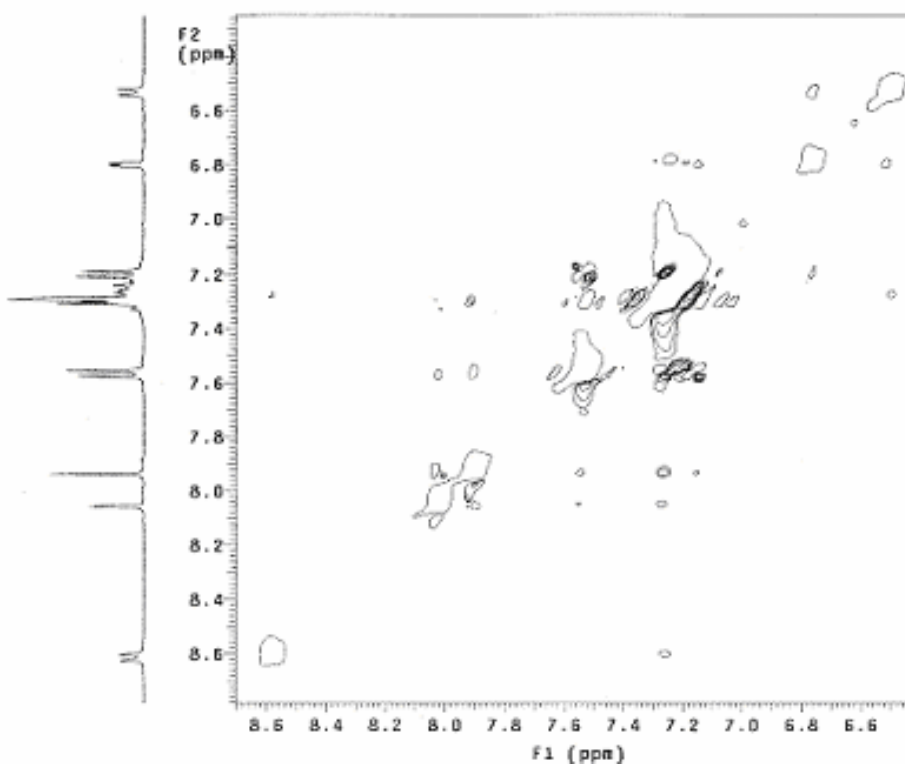

Figure S3.  $^1\text{H}$ - $^1\text{H}$  NOESY Spectrum of 3a

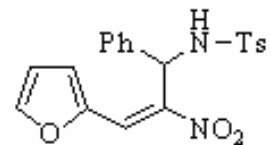

3a

INH-152-COSY

Data Collected on: 5/13/2004 10:00:00  
 Archive directory: /exp04/004/10/1/5/5/152/004  
 Sample directory: 004\_2895-01-20  
 File: 004-152-COSY

Pulse Sequence: COSY  
 Solvent: DMSO

Relax. delay: 1.000 sec  
 Acq. time: 0.150 sec  
 VPROB: zgpg30  
 CD VialID: 4745.0 Hz  
 4 repetitions  
 200 increments  
 OBSERVE: 1H, 399.8823483 MHz  
 DATA PROCESSING:  
 S1: time 0:11 8.875 sec  
 F1: DATA PROCESSING  
 S1: time 0:11 8.882 sec  
 F1: time 0:14 2.248 sec  
 Total time: 17 min

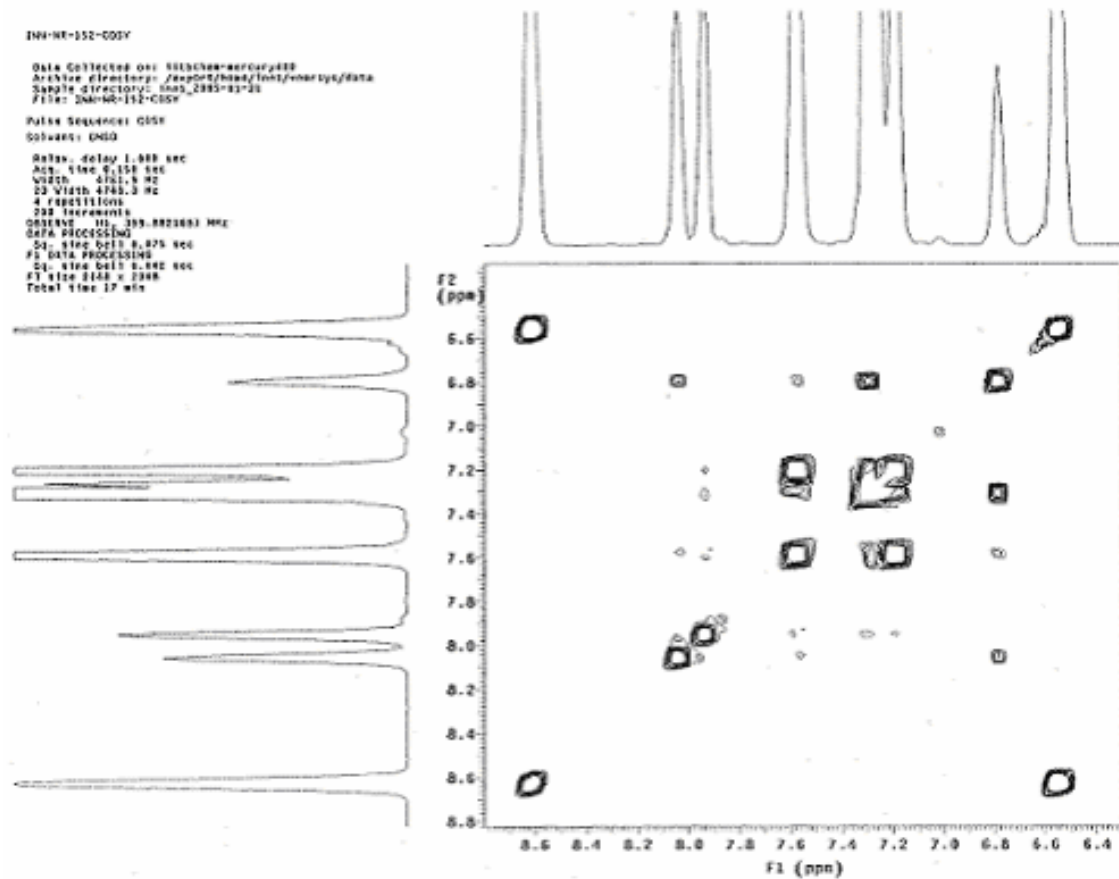

Figure S4. <sup>1</sup>H-<sup>1</sup>H COSY Spectrum of 3a

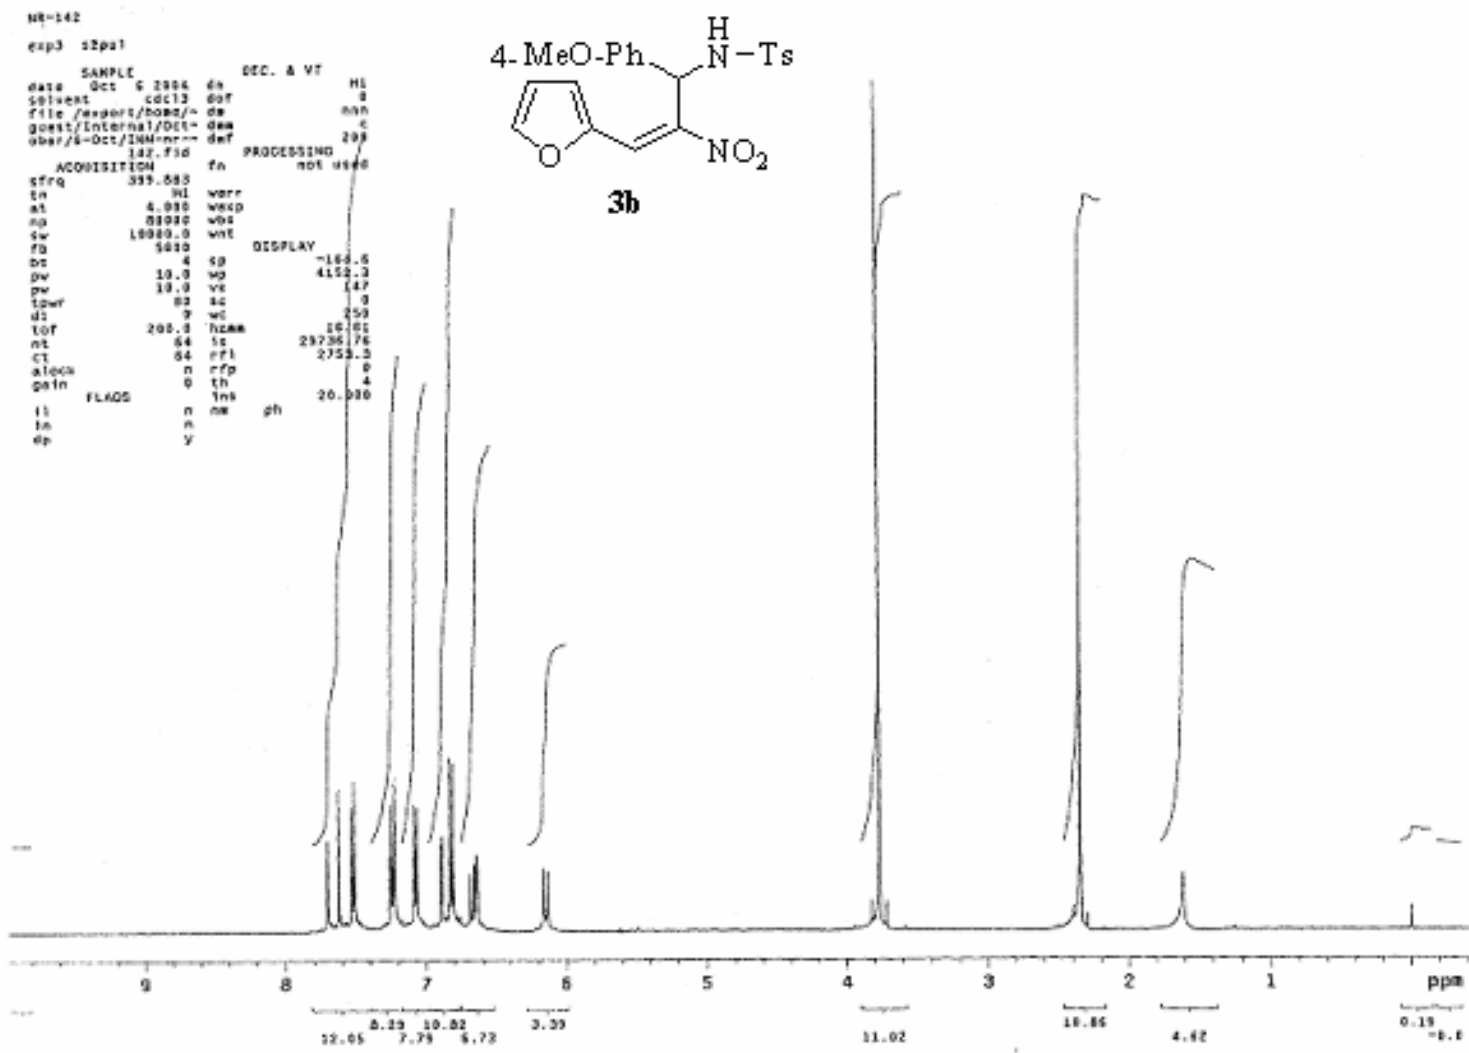

Figure S5. <sup>1</sup>H NMR Spectrum of **3b**

```

NR-142
exp3 s2p1
SAMPLE          SPECIAL
date  Jun 8 2004  comp  not used
solvent  CDCl3  gain  10
file          exp  spin  not used
ACQUISITION    hst  2.000
sw  25000.0  pwr0  9.500
st  1.200  s1fa  10.000
rp  64000  FLAG  h
f0  10000  f1  h
b0  6  f0  h
d1  3.000  d0  7
nt  3200  h0  h
CL  172  PROCESSING  1.00
TRANSMITTER    lb  not used
in  C13  fn  DISPLAY
sfreq  75.438  sp  -3.2
tot  746.8  wp  10000.0
tpwr  55  rft  10000.0
pw  4.750  rfp  2015.4
DECOUPLER      H1  fp  -134.9
d0  0  fp  -300.0
cm  yyy  PLOT
dsw  w  wc  250
sper  35  sc  0
dat  10000  vl  82
sh  h  6
nm  cdc ph  6

```

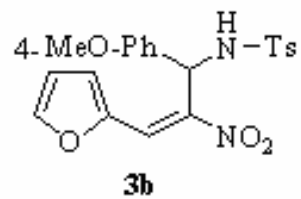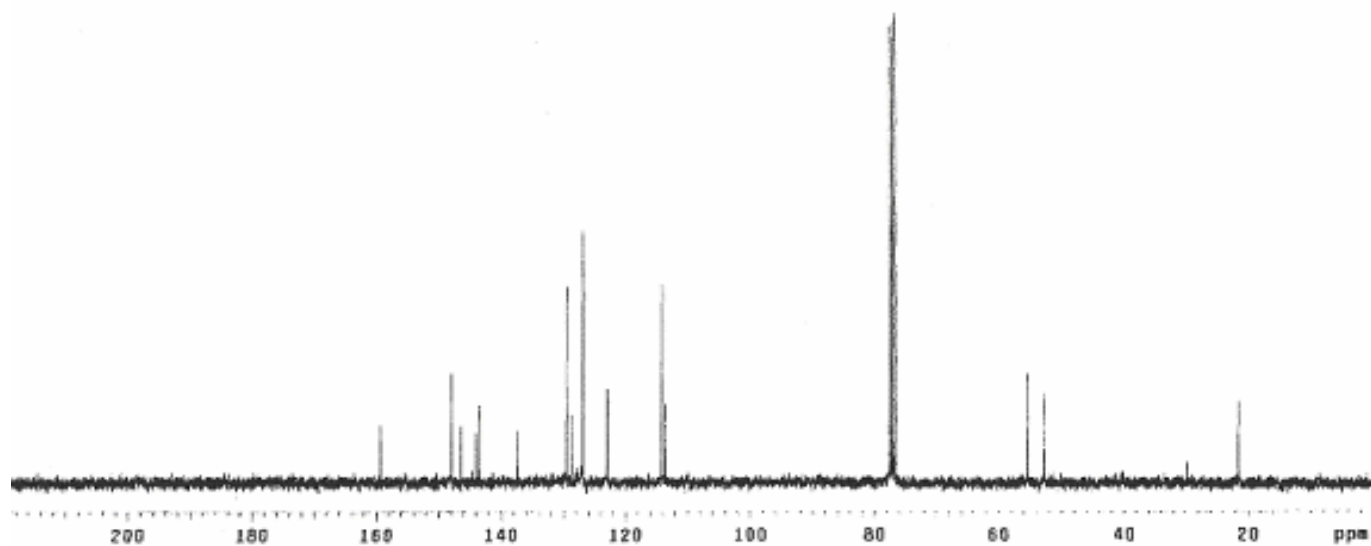

Figure S6. <sup>13</sup>C NMR Spectrum of **3b**



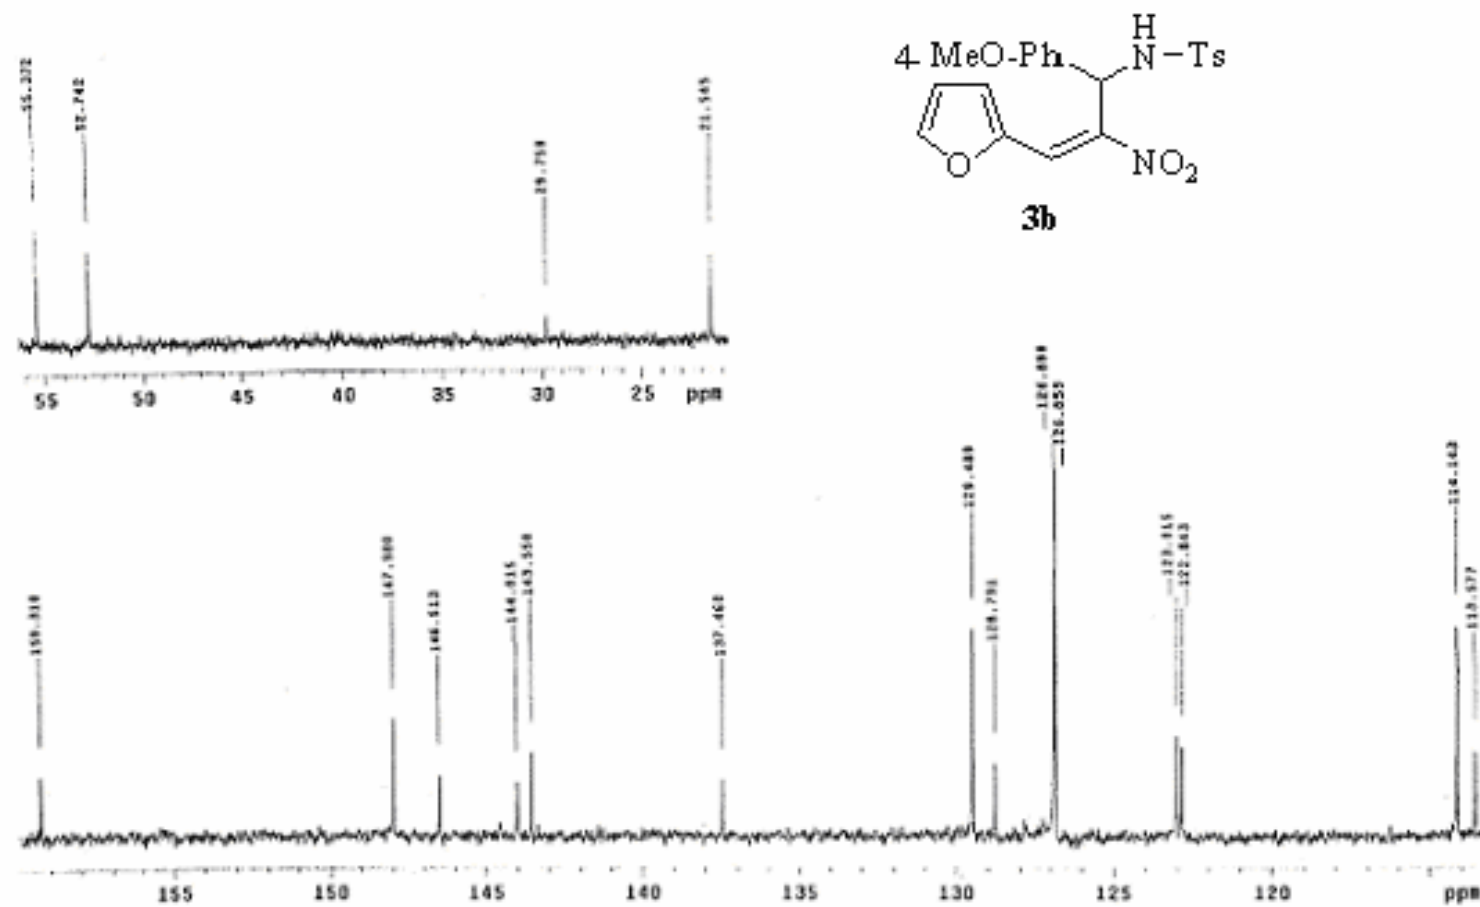

Figure S7. <sup>13</sup>C NMR Spectrum of **3b** (Expansion)

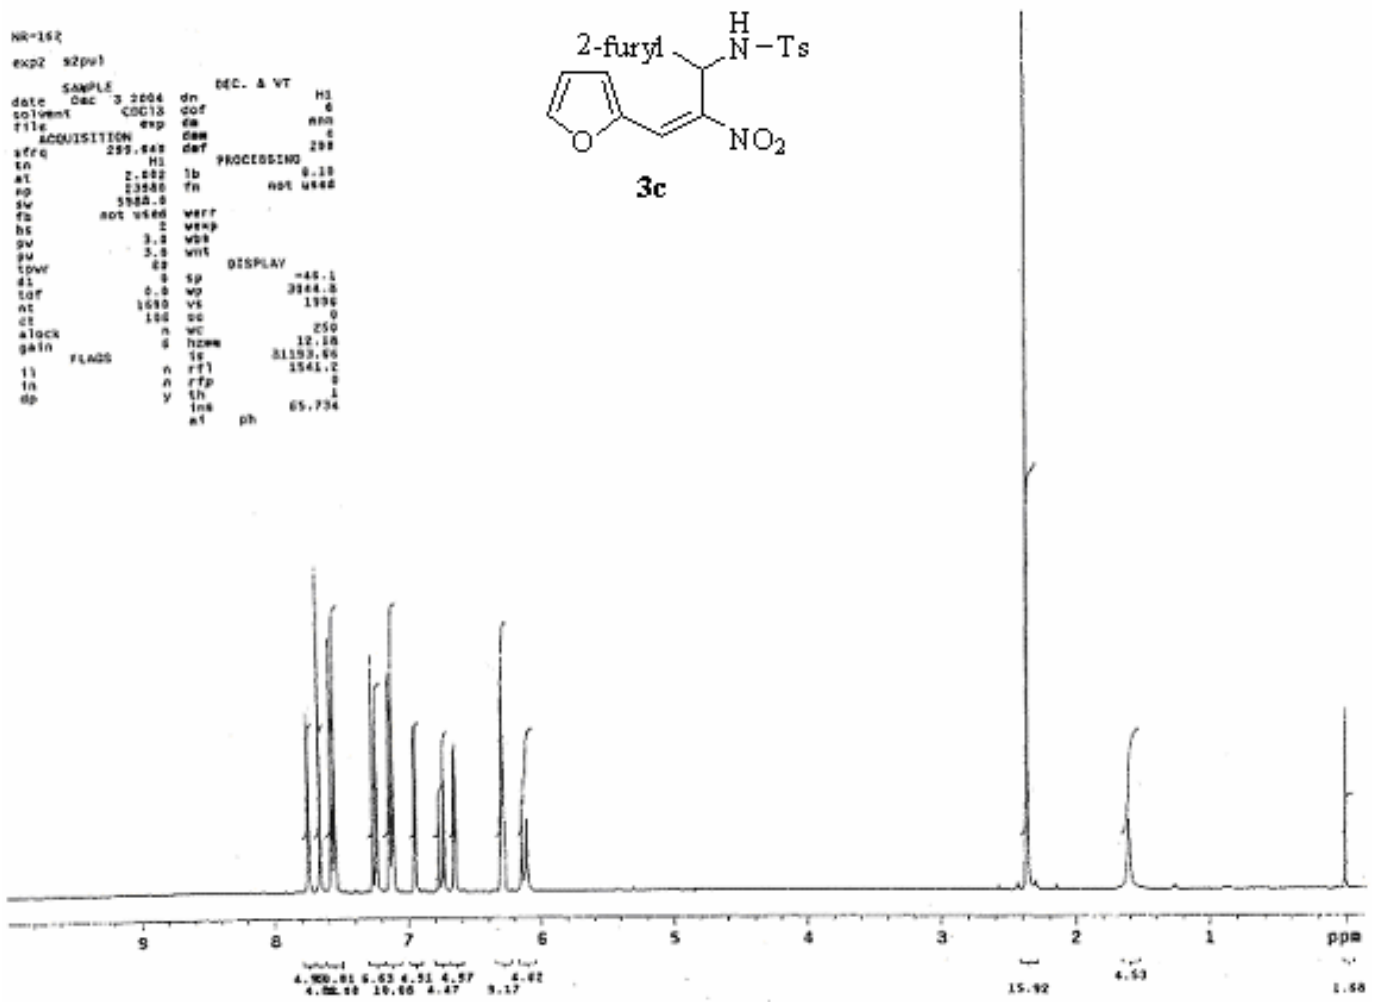

Figure S8. <sup>1</sup>H NMR Spectrum of **3c**

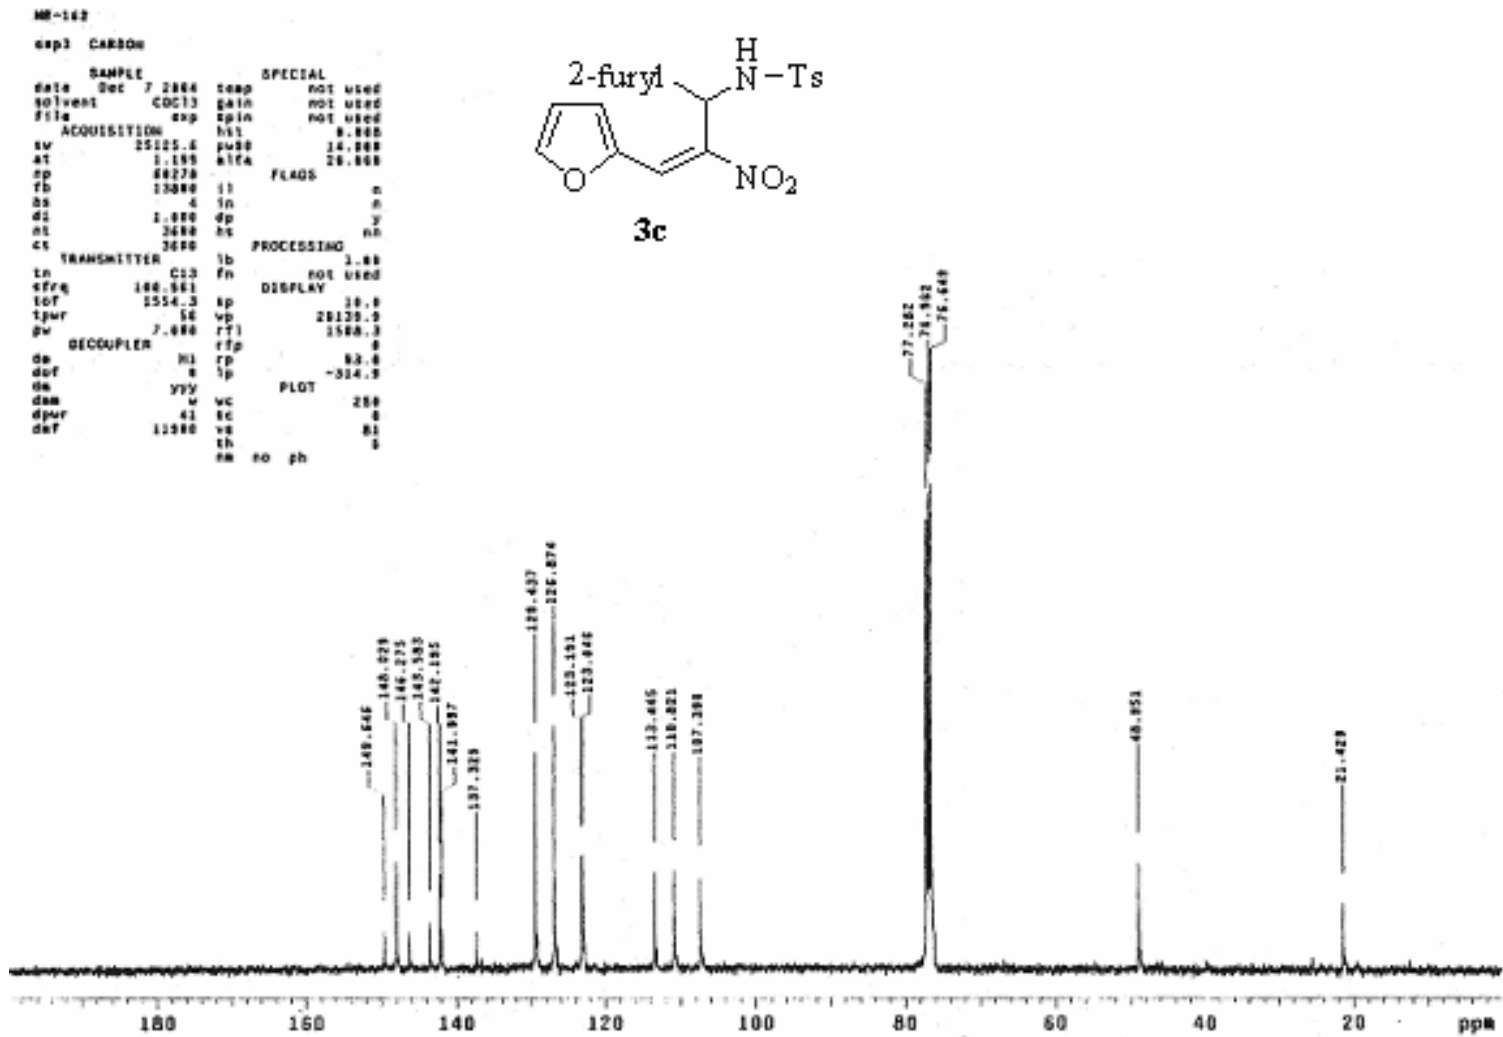

Figure S9.  $^{13}\text{C}$  NMR Spectrum of **3c**

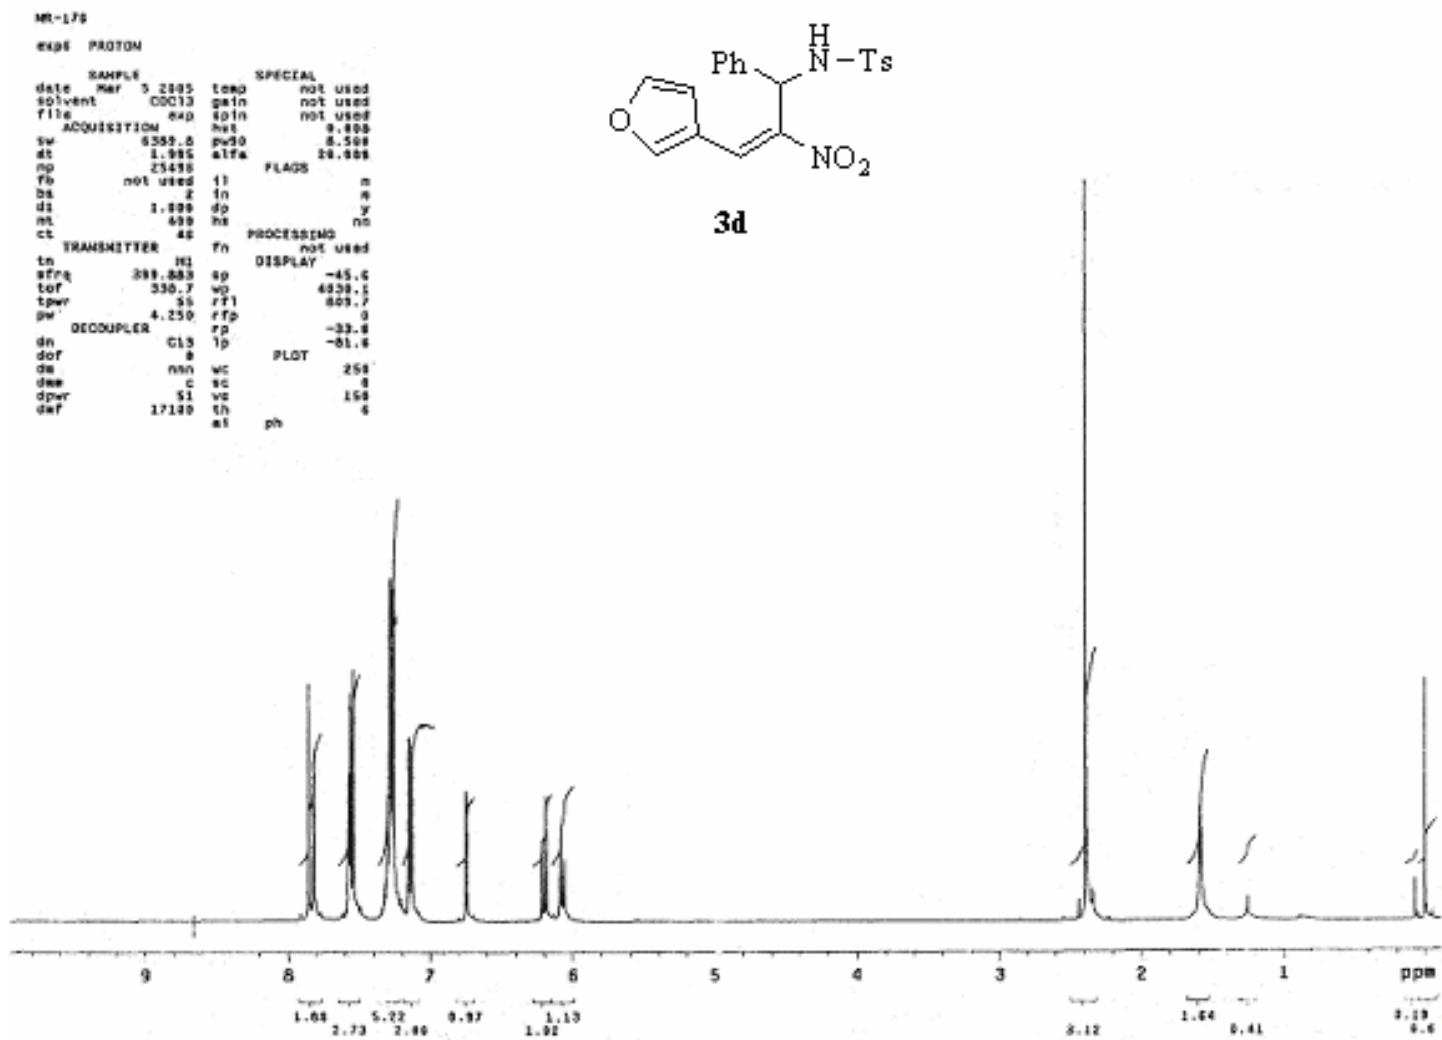

Figure S10. <sup>1</sup>H NMR Spectrum of **3d**

```

NR-176-130
exp3 s2pu1
SAMPLE
date Mar 9 2005 temp not used
solvent COCl2 gain 18
file exp spin not used
ADQUISITION
sw 25000.0 hst 0.000
at 1.015 pws 11.500
f0 10752.0 rfa 20.000
f1 FLAGE f1 0
f2 4 f2 m
d0 3.000 dp 3
d1 1680 h0
d2 124
ct PROCESSING
lb 2.00
tm C13 fa not used
sfreq 75.438 display
tof 748.9 sp -540.0
tpwr 55 wp 15801.2
pv 4.750 rfs 10034.0
DECOUPLER rfg 5815.0
hl rf -175.0
dof 4 lp -370.0
de 333 w PLOT
dca 30 wc 256
dpr 30 sc 0
sar 11300 ve 66
rh th 0
ph

```

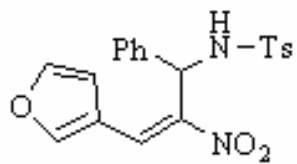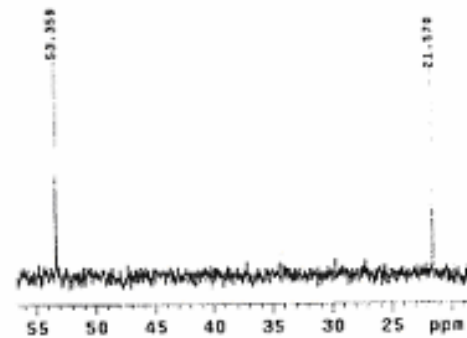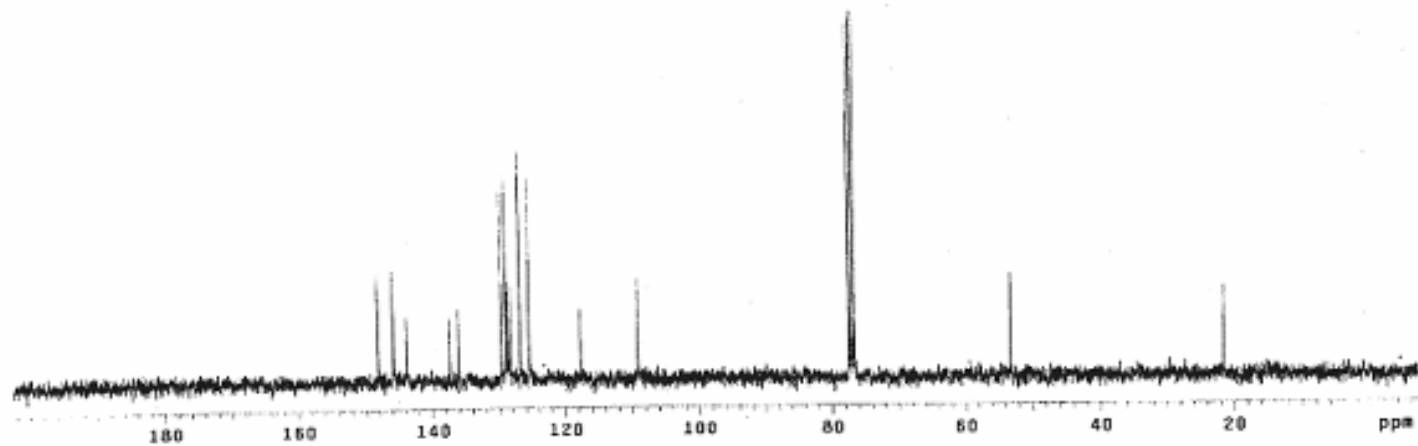

Figure S11. <sup>13</sup>C NMR Spectrum of 3d

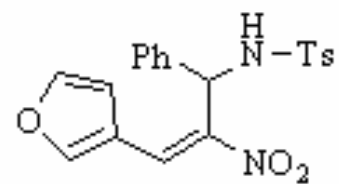

**3d**

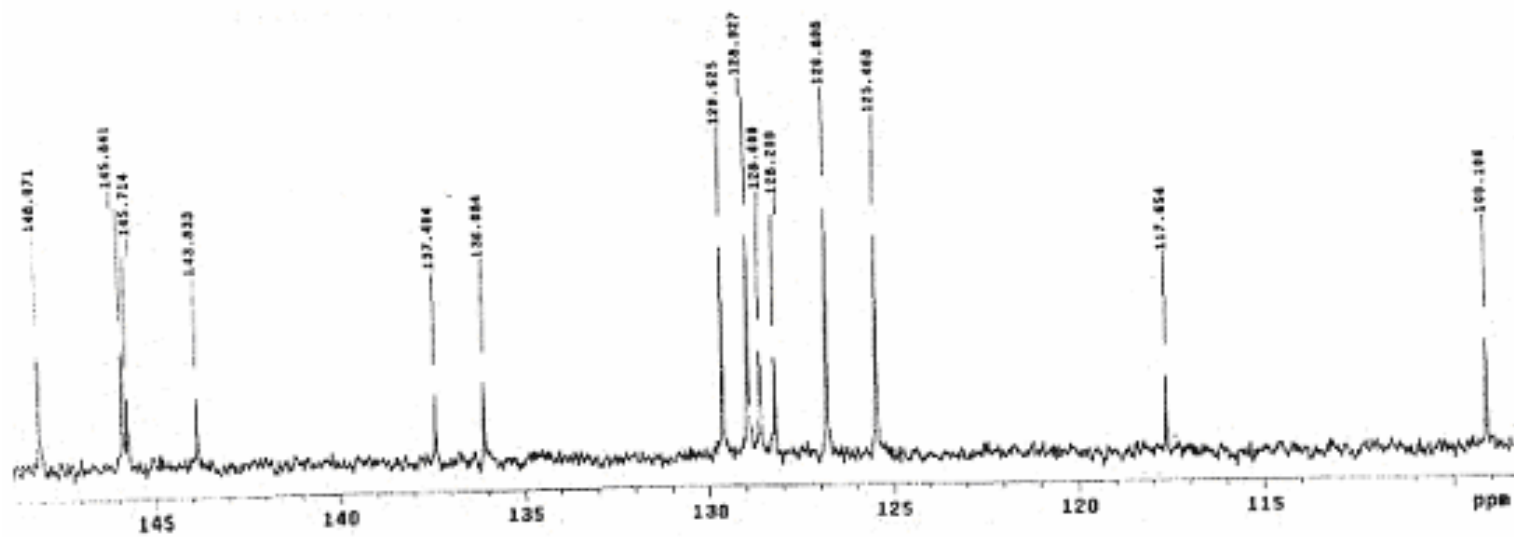

**Figure S12.** <sup>13</sup>C NMR Spectrum of **3d** (Expansion)

```

NR-184
exp#  PROTON
SAMPLE
date   Mar 11 2005  temp  not used
solvent CDC13      gain  not used
file    exp        cp1m  not used
ACQUISITION  h1    1.000
sw      5200.0     p000  4.500
at      1.595     w17a  20.000
ap      25400     FLAG
fb      not used  f1    n
bs      2         fa    m
dl      1.000     dp    y
nt      400      h0
ct      0         PROCESSING  nh
TRANSMITTER  f0  not used
ch      H1      DISPLAY
cfrq    300.000  sp      -45.0
tot     330.7   wd      4030.7
tprw    15      r11    000.7
pw      4.250   r1p    -30.0
DECOUPLER  C13  ip      -85.0
dof     0       PLOT
ds      non     wd      250
das     0       sc      0
dpar    51      vs      241
dnt     17100  th      10
          at    ph

```

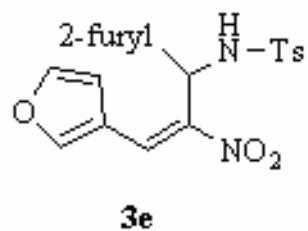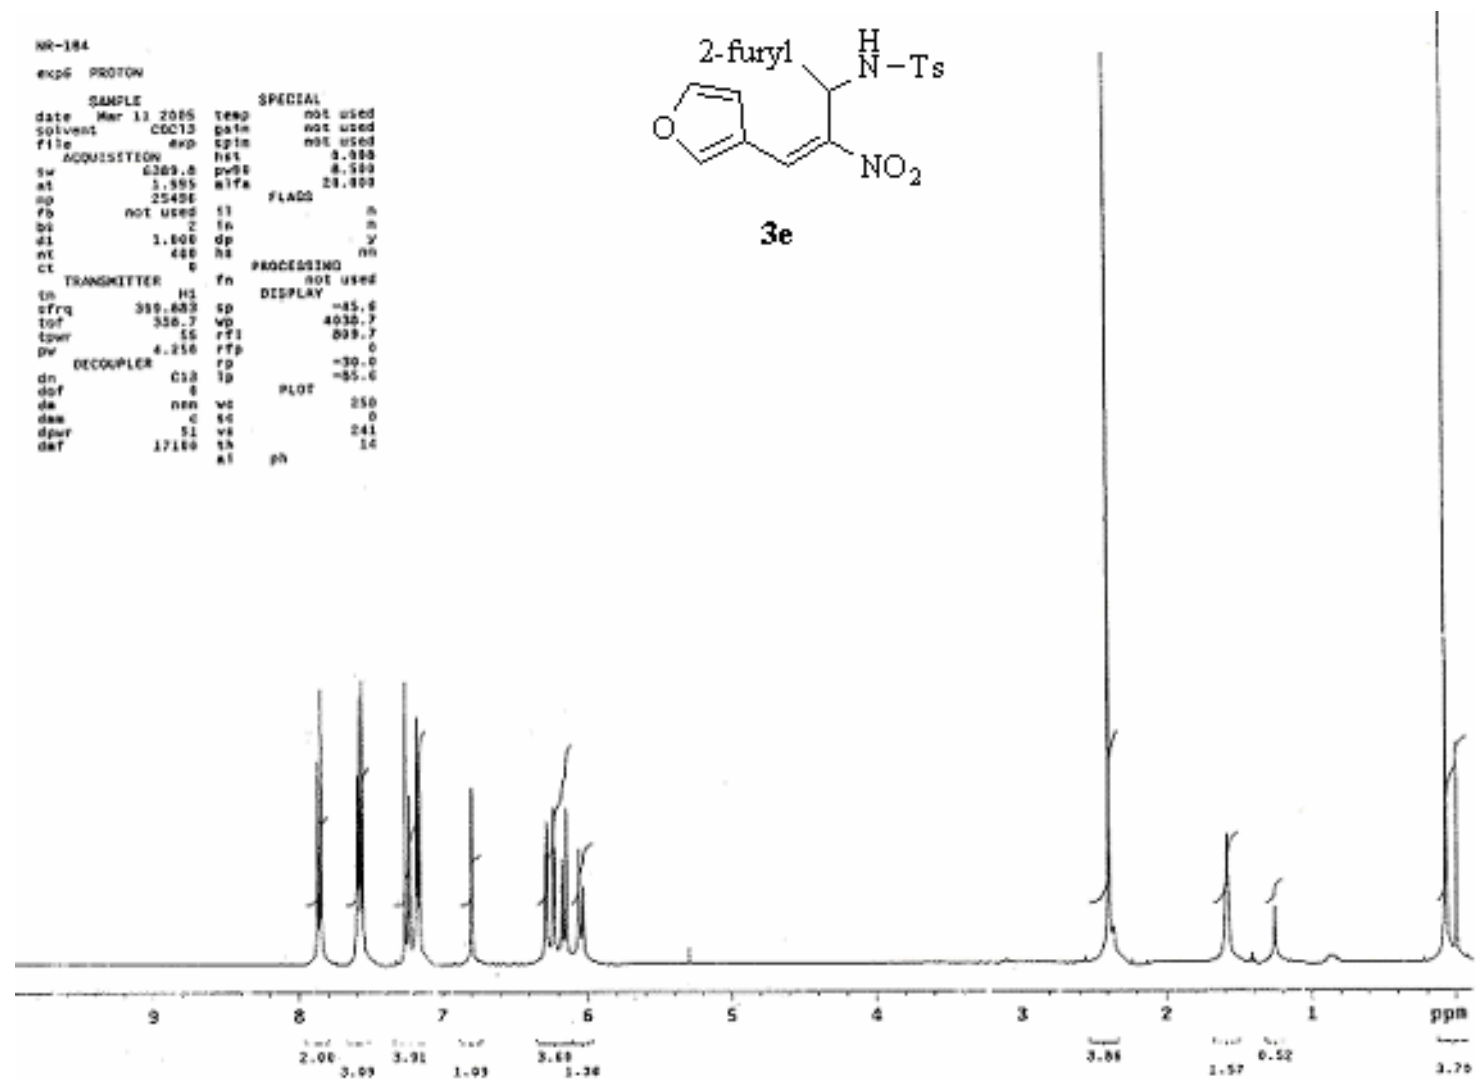

Figure S13. <sup>1</sup>H NMR Spectrum of **3e**

NR-184

exp6 CARBON

| SAMPLE      |             | SPECIAL    |          |
|-------------|-------------|------------|----------|
| date        | Mar 13 2015 | time       | not used |
| solvent     | CDCl3       | gain       | not used |
| file        | exp         | spin       | not used |
| ACQUISITION |             | hst        | 0.000    |
| sv          | 25125.0     | pw90       | 14.000   |
| at          | 1.199       | altm       | 20.000   |
| np          | 80273       | FLAGS      |          |
| fb          | 12000       | fl         | n        |
| bs          | 4           | sn         | n        |
| d1          | 1.400       | dp         | y        |
| nt          | 1800        | ns         | ns       |
| ct          | 0           | PROCESSING |          |
| TRANSMITTER |             | lb         | 1.00     |
| tn          | CL3         | fn         | not used |
| strq        | 180.561     | DISPLAY    |          |
| tof         | 1554.3      | sp         | -55.0    |
| tpwr        | 50          | wp         | 10158.5  |
| pv          | 7.000       | rfl        | 9253.7   |
| DECOUPLER   |             | rff        | 7782.5   |
| ca          | HL          | rp         | 48.5     |
| cof         | 0           | lp         | -331.2   |
| ca          | yyy         | PLOT       |          |
| cam         | w           | wc         | 250      |
| davr        | 41          | sc         | 0        |
| dat         | 11300       | va         | 40       |
|             |             | th         | 2        |
| at          | no          | ph         | 2        |

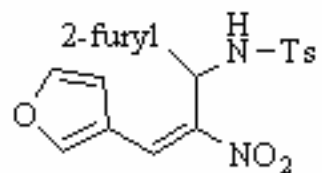

3e

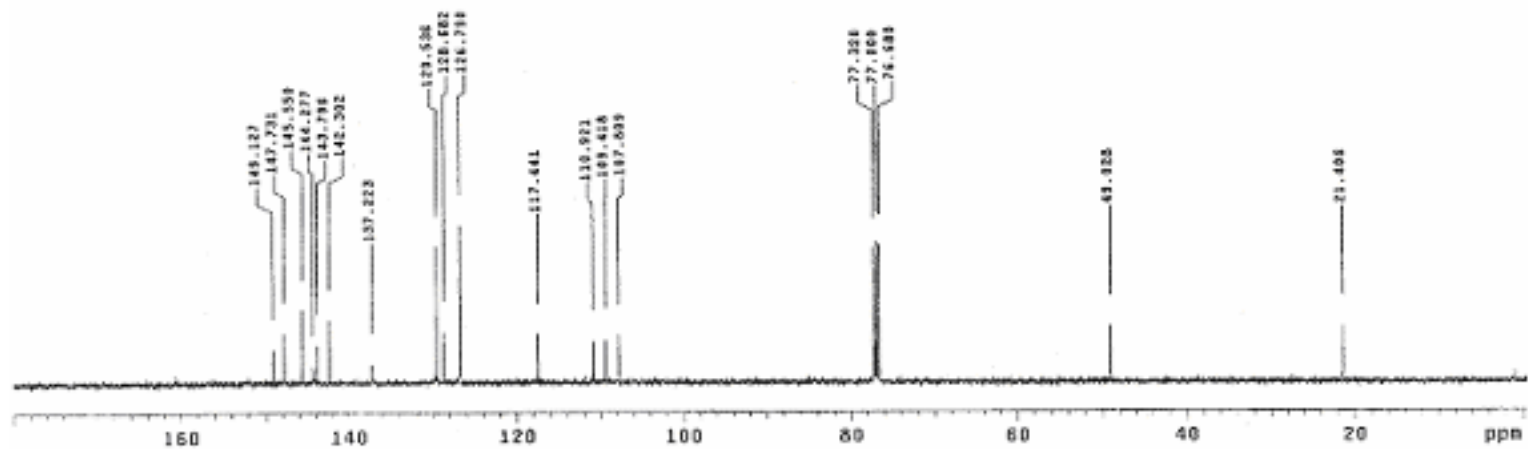

Figure S14. <sup>13</sup>C NMR Spectrum of 3e



```

MR-178
exp# PROTON
SAMPLE
date Mar 3 2005 TEMP not used
solvent CDCl3 gain not used
file exp gain not used
ACQUISITION hst 0.000
sw 6000.0 pws 8.500
at 1.885 aifa 20.000
ap 25.000 FLAQ n
fb not used ii n
gc 4 in n
gl 1.000 op y
ht 64 hs nh
ct TRANSMITTER 64 PROCESSING not used
ln hl DISPLAY
frc 359.863 sp -79.2
tof 338.7 wd 4167.5
tpwr 55 rfi 889.3
pw 4.259 rfp 8
dc DECOUPLER c13 rpd -35.4
dd 0 tp -74.3
ddt 0 PLOT 250
da nnn wc 0
dss c 60 51
dpr 51 ve 51
dnt 17100 lb 10
at ph 4

```

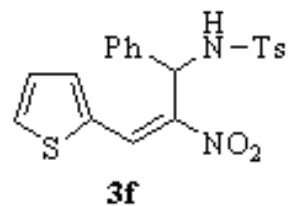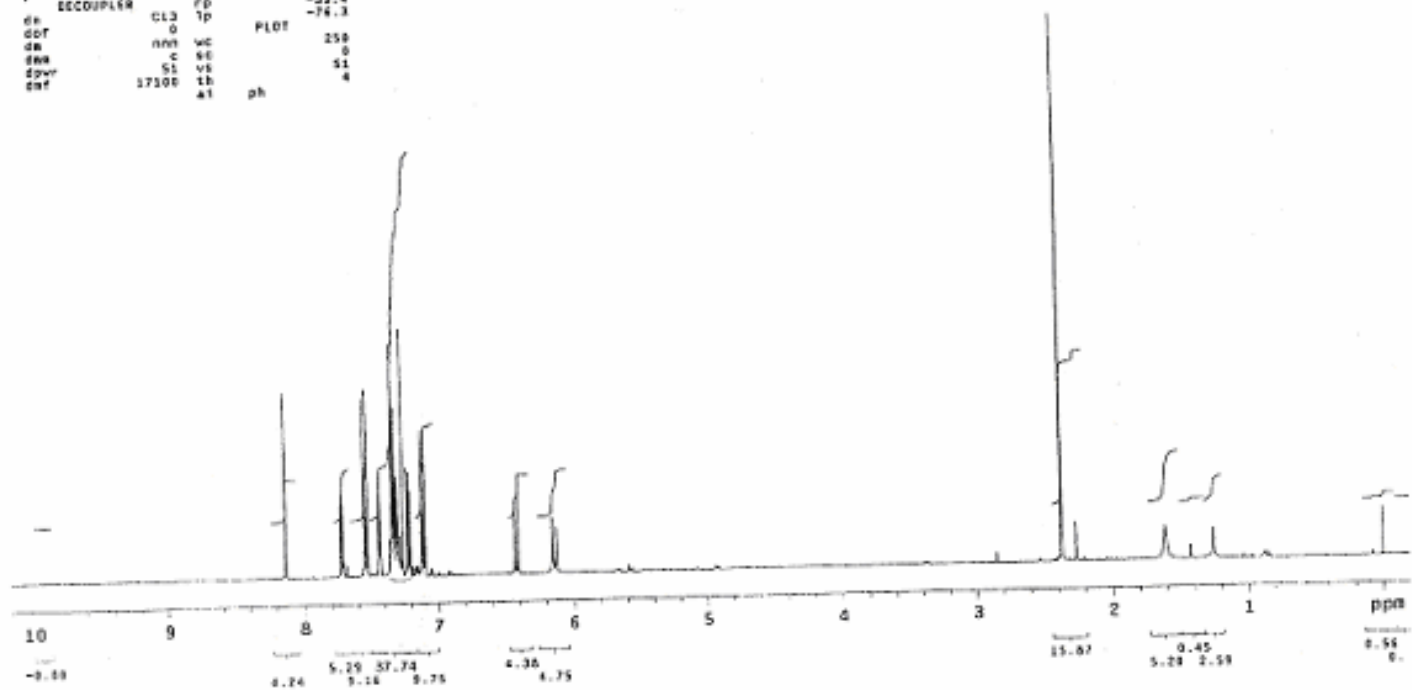

Figure S15. <sup>1</sup>H NMR Spectrum of 3f

NR-17B

exp3 CARBON

| SAMPLE           |                | SPECIAL    |          |
|------------------|----------------|------------|----------|
| date             | Oct 5 2005     | temp       | not used |
| solvent          | CDCl3          | gain       | not used |
| file             | /export/home/~ | spin       | not used |
| inn1             | october/3thoc  | hst        | 0.000    |
| t/NR-17B-C13.f3d | pv93           | 14.000     |          |
| ACQUISITION      |                | atfa       | 20.000   |
| -----            |                |            |          |
| sw               |                | 25125.0    | FLAGS    |
| st               | 1.100          | sl         | n        |
| sp               | 80270          | ln         | n        |
| fb               | 13000          | dp         | y        |
| bc               | 4              | hs         | n        |
| dl               | 1.000          | PROCESSING | nt       |
| nt               | 50000          | lb         | 2.00     |
| ct               | 584            | fn         | not used |
| TRANSMITTER      |                | DISPLAY    |          |
| tn               | C13            | sp         | 5.4      |
| xfrq             | 100.621        | wp         | 20100.0  |
| top              | 1534.3         | rft        | 0155.0   |
| tpwr             | 56             | rfd        | 7742.3   |
| pv               | 7.000          | rp         | 67.0     |
| DECOUPLER        |                | lp         | -324.0   |
| -----            |                |            |          |
| dn               |                | hl         | PL0T     |
| dof              | 0              | wc         | 250      |
| da               | yyy            | sc         | 8        |
| daw              | w              | vs         | 51       |
| dpvr             | 41             | th         | 4        |
| daf              | 11300          | al         | no ph    |

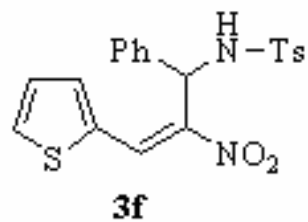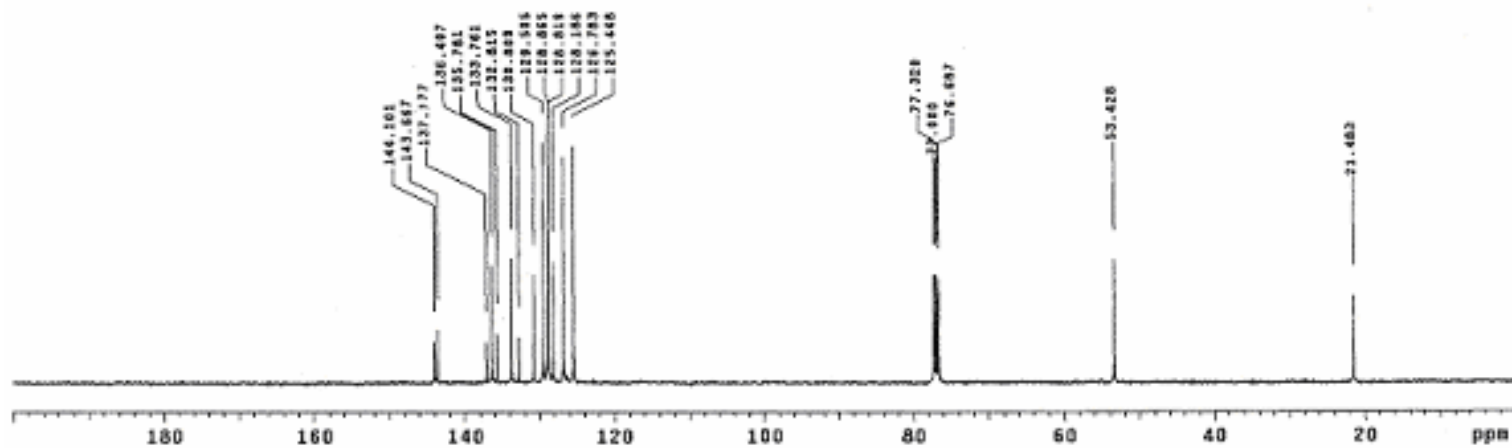

Figure S16. <sup>13</sup>C NMR Spectrum of **3f**

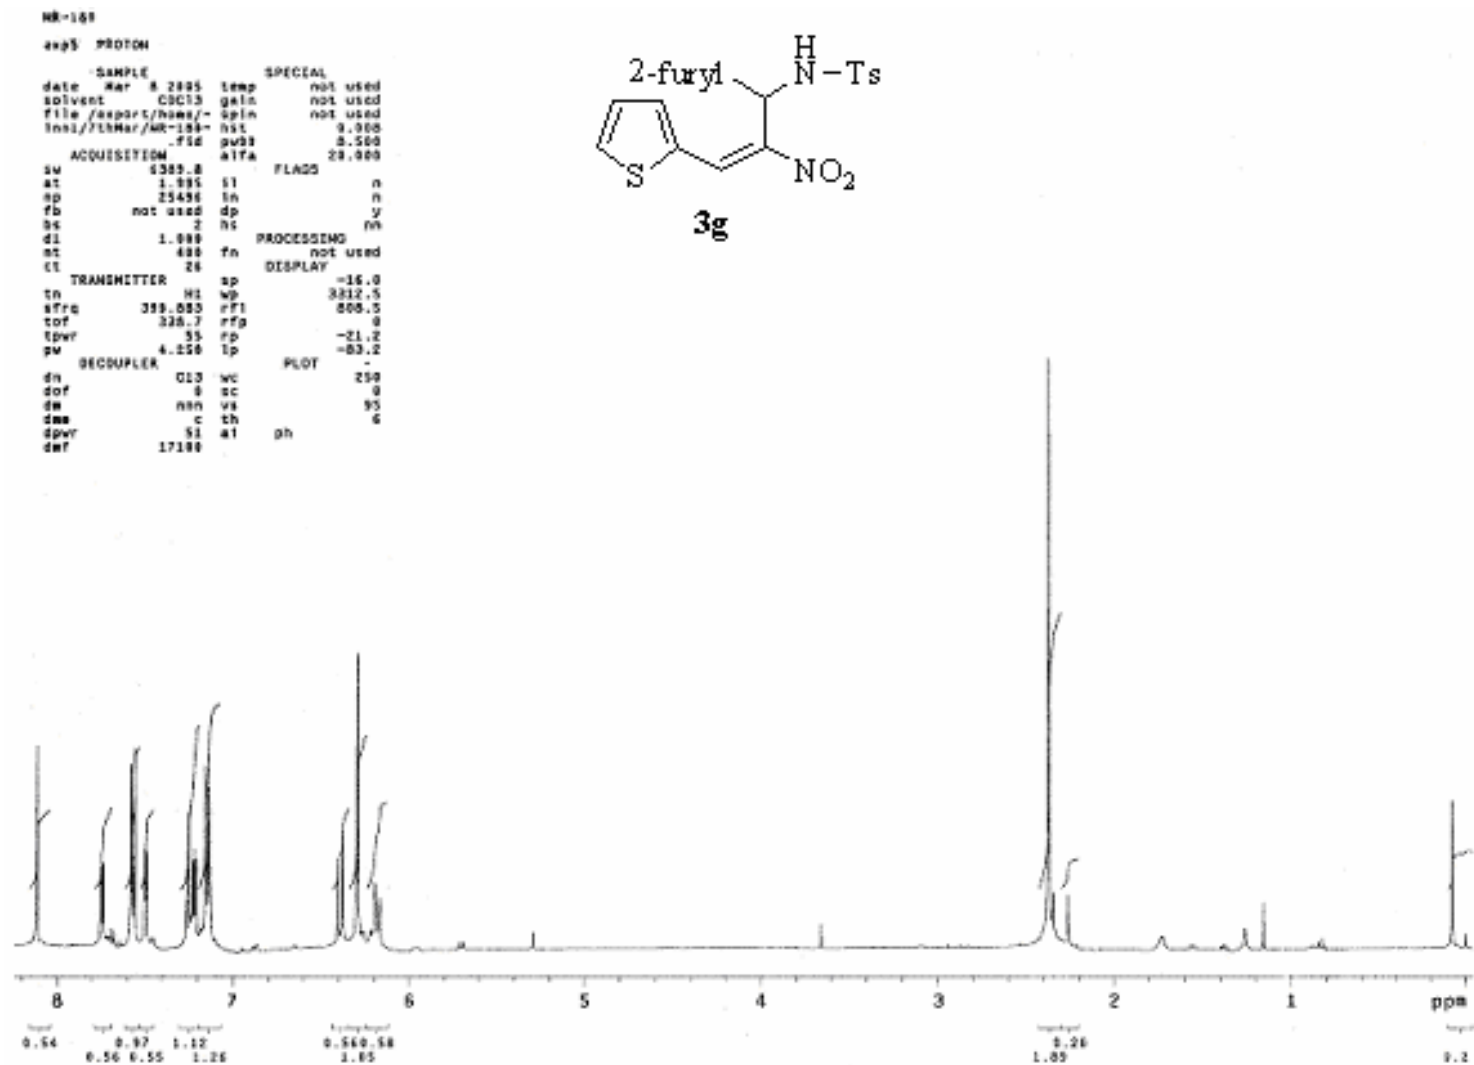

Figure S17. <sup>1</sup>H NMR Spectrum of **3g**

```

NR-180
exp# CARBON
SAMPLE
date Mar 5 2005
solvent CDCl3
file exp
ACQUISITION
sw 25125.6
at 1.199
sp 86270
fo 13000
bs 4
dl 1.000
nt 1000
ct 980
SPECIAL
temp not used
gain not used
spin not used
hst 0.000
puls 14.000
alpha 20.000
FLAGS
i1 n
in n
dp y
hc an
PROCESSING
f2 1.00
f3 800
f4 4500
f5 1310.7
f6 21427.4
f7 9250.9
f8 7742.3
f9 64.7
f10 -874.7
PLOT
w 250
sc 8
vs 100
th 4
al no ph
TRANSMITTER
tn C13
afreq 100.621
tof 1554.3
tpwr 50
pw 7.000
DECOUPLER
dn HI
sot 0
dm yyy
dnn w
dpr 41
dmf 11010

```

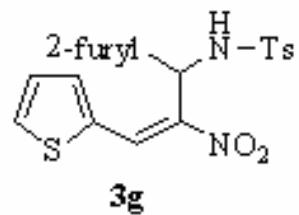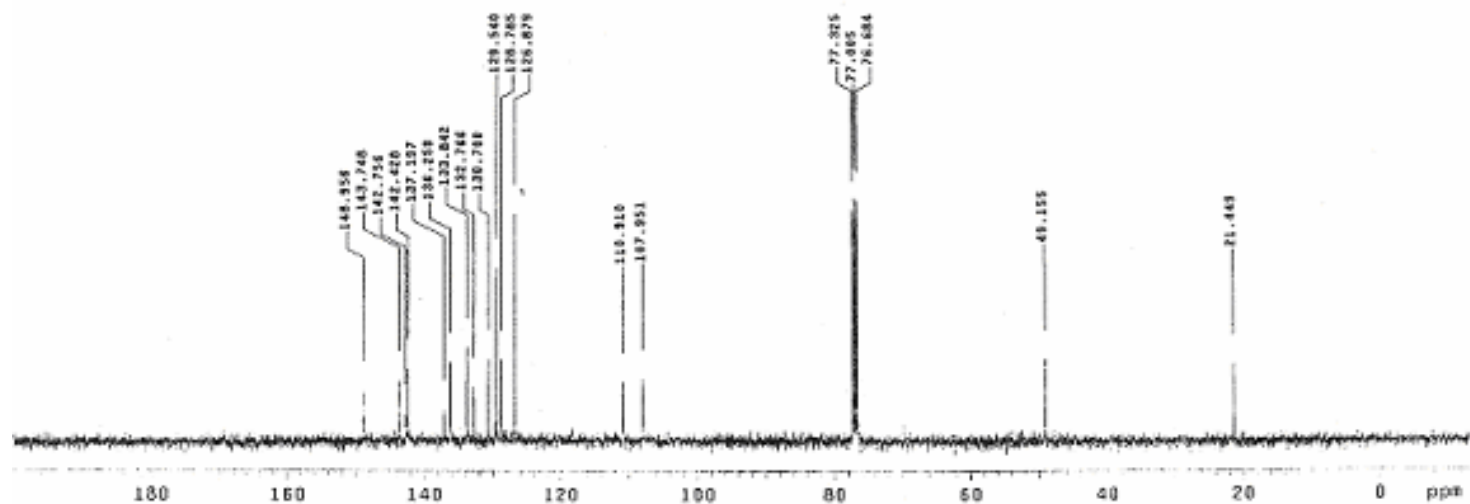

Figure S18. <sup>13</sup>C NMR Spectrum of 3g

MR-179

Exp1 PROTON

| PARAMETER   | VALUE       | UNIT | DESCRIPTION |
|-------------|-------------|------|-------------|
| DATE        | FEB 25 1985 |      |             |
| TIME        | 12:15       |      |             |
| PROG        | CDCL3       |      |             |
| INSTR       | FT/MS       |      |             |
| PROB        | 5MM         |      |             |
| NUC1        | 1H          |      |             |
| NUC2        | 13C         |      |             |
| FLAGS       | 29.000      |      |             |
| ACQUISITION |             |      |             |
| SI          | 3200.0      | Hz   |             |
| ST          | 1.000       | s    |             |
| SP          | 15.000      | Hz   |             |
| TD          | 65536       |      |             |
| SB          | 1           |      |             |
| AL          | 1.000       |      |             |
| HT          | 400         | Hz   |             |
| CT          | 02          |      |             |
| TRANSMITTER |             |      |             |
| LS          | H1          |      |             |
| RF1         | 299.820     | MHz  |             |
| RF2         | 320.7       | MHz  |             |
| CPUR        | 50          | Hz   |             |
| PR          | 4.250       | Hz   |             |
| RECEIVER    |             |      |             |
| SI          | C13         |      |             |
| ST          | 2           |      |             |
| SP          | 15.000      | Hz   |             |
| TD          | 65536       |      |             |
| SB          | 1           |      |             |
| AL          | 1.000       |      |             |
| HT          | 400         | Hz   |             |
| CT          | 02          |      |             |

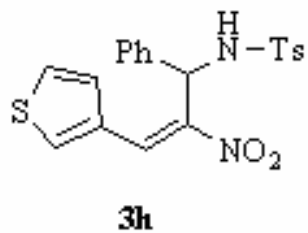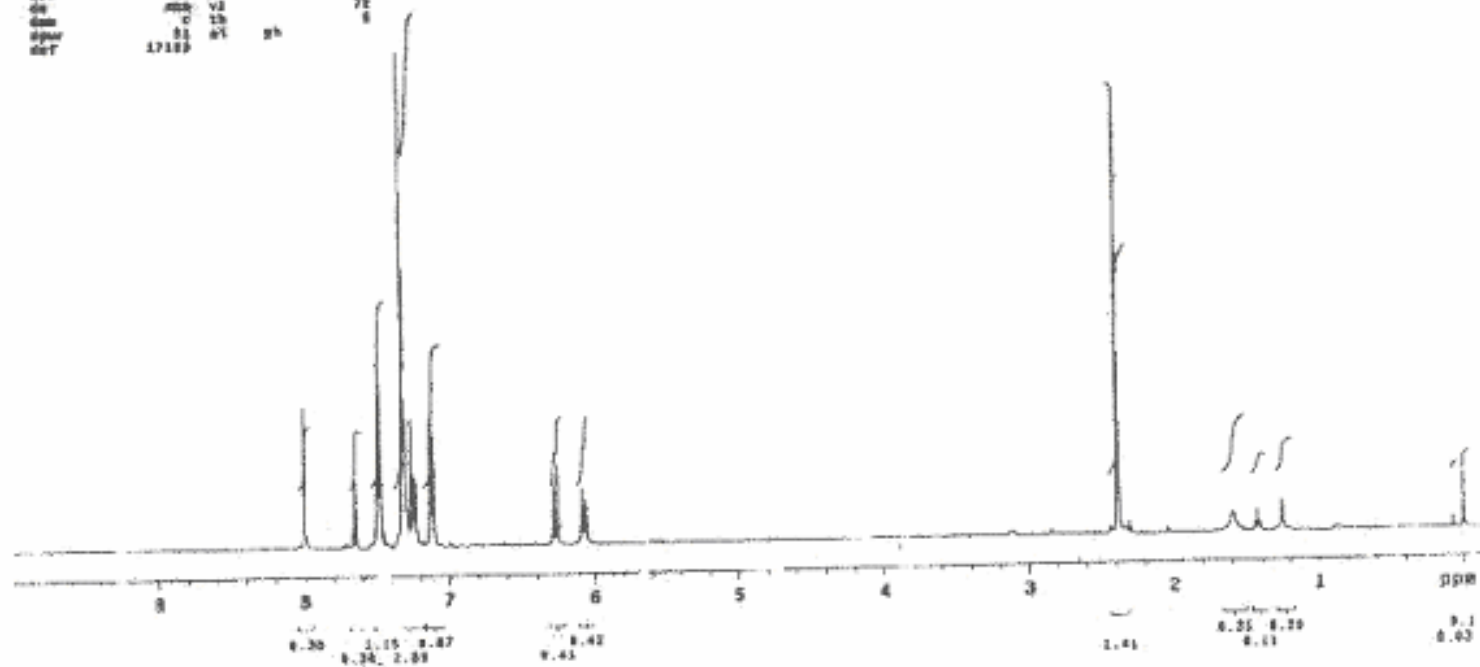

Figure S19. <sup>1</sup>H NMR Spectrum of **3h**

NR-175

exp6 CARBON

| SAMPLE      |             | SPECIAL    |          |
|-------------|-------------|------------|----------|
| date        | Mar 27 2003 | temp       | not used |
| solvent     | CDCl3       | gain       | not used |
| file        | exp         | spin       | not used |
| ACQUISITION |             | hst        | 8.888    |
| sv          | 29125.6     | pr99       | 14.888   |
| at          | 1.188       | at7a       | 28.888   |
| nd          | 8079        | FLAGS      |          |
| fb          | 13889       | fl         | n        |
| bc          | 4           | in         | m        |
| dl          | 1.888       | ep         | y        |
| nt          | 1888        | hs         | ns       |
| cl          | 1788        | PROCESSING |          |
| TRANSMITTER |             | td         | 1.98     |
| tr          | C13         | fa         | not used |
| sfrq        | 100.621     | DISPLAY    |          |
| tot         | 1554.3      | ep         | 5.4      |
| tpwr        | 55          | vd         | 16125.5  |
| pr          | 7.888       | rt1        | 8255.2   |
| DECOUPLER   |             | rt2        | 7742.3   |
| dn          | H1          | rp         | 48.8     |
| dot         | 8           | lp         | -328.3   |
| sw          | 20V         | PLOT       |          |
| dsw         | w           | wd         | 258      |
| cpwr        | 41          | sc         | 8        |
| dwt         | 11888       | vs         | 38       |
|             |             | th         | 2        |
|             |             | rm         | 80 ph    |

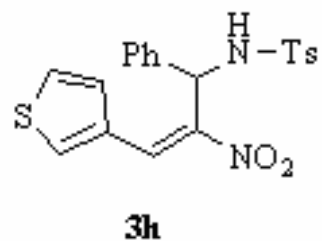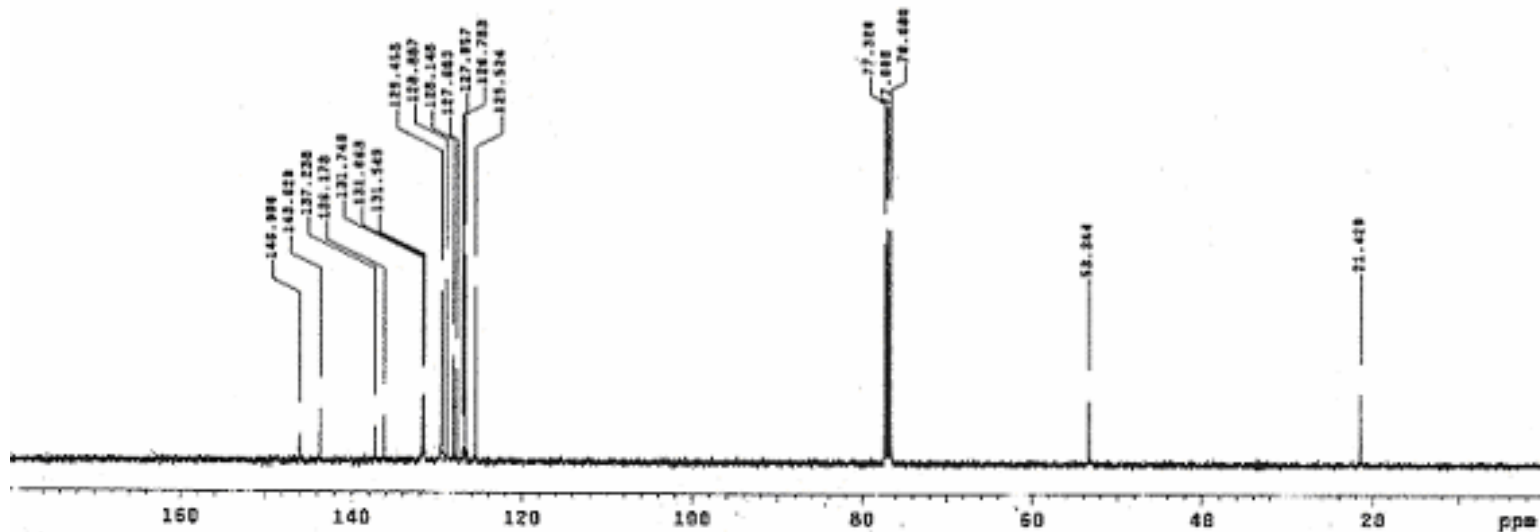

Figure S20. <sup>13</sup>C NMR Spectrum of 3h

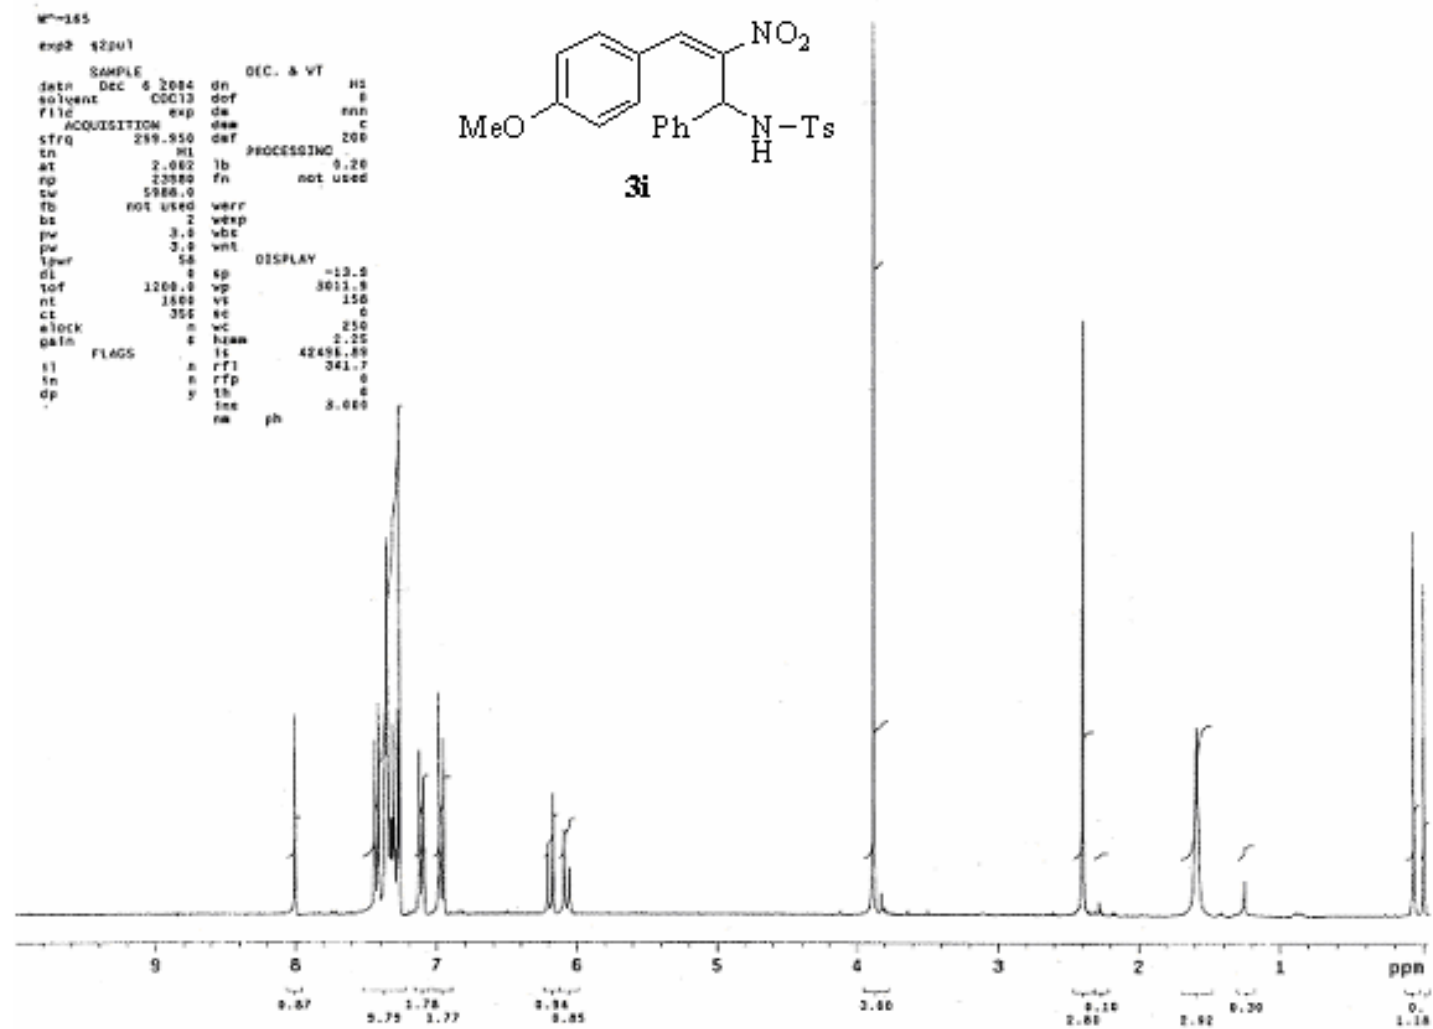

Figure S21. <sup>1</sup>H NMR Spectrum of **3i**

```

NR-165-C13
exp4 CARBON
SAMPLE
date Sep 28 2005 temp not used
solvent CDCl3 gain not used
file /export/home/ spin not used
fn3/September/201- not
h/NR-165-C13.f16 pw90 14.800
ACQUISITION alfa 20.000
sw 25125.6 FLAS
at 1.199 t1 n
ap 80276 tn n
fb 13800 dp y
ss 4 hs
cl 1.000 PROCESSING
ct 5000 tb 2.00
ct 716 tn not used
TRANSMITTER DISPLAY
tn C13 cp -25.3
strq 199.561 vp 23172.9
tof 1554.3 rft 9252.8
tpwr 56 rfp 7742.3
pw 7.000 rp 74.7
DECOUPLER lp -325.7
dn H1 PLOT
dof 0 vc 250
dw 22V tc 8
dwm v vs 84
dpwr 41 th 4
dwt 11900 at no ph

```

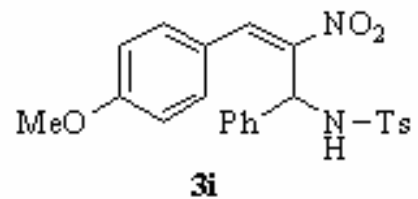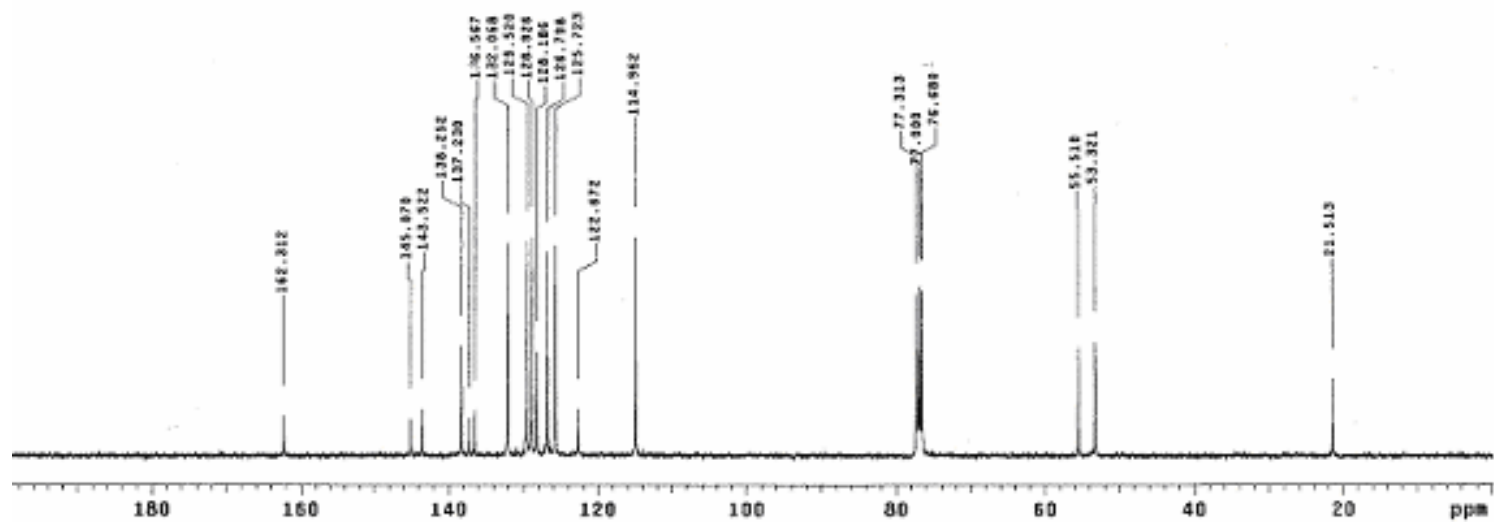

Figure S22. <sup>13</sup>C NMR Spectrum of **3i**



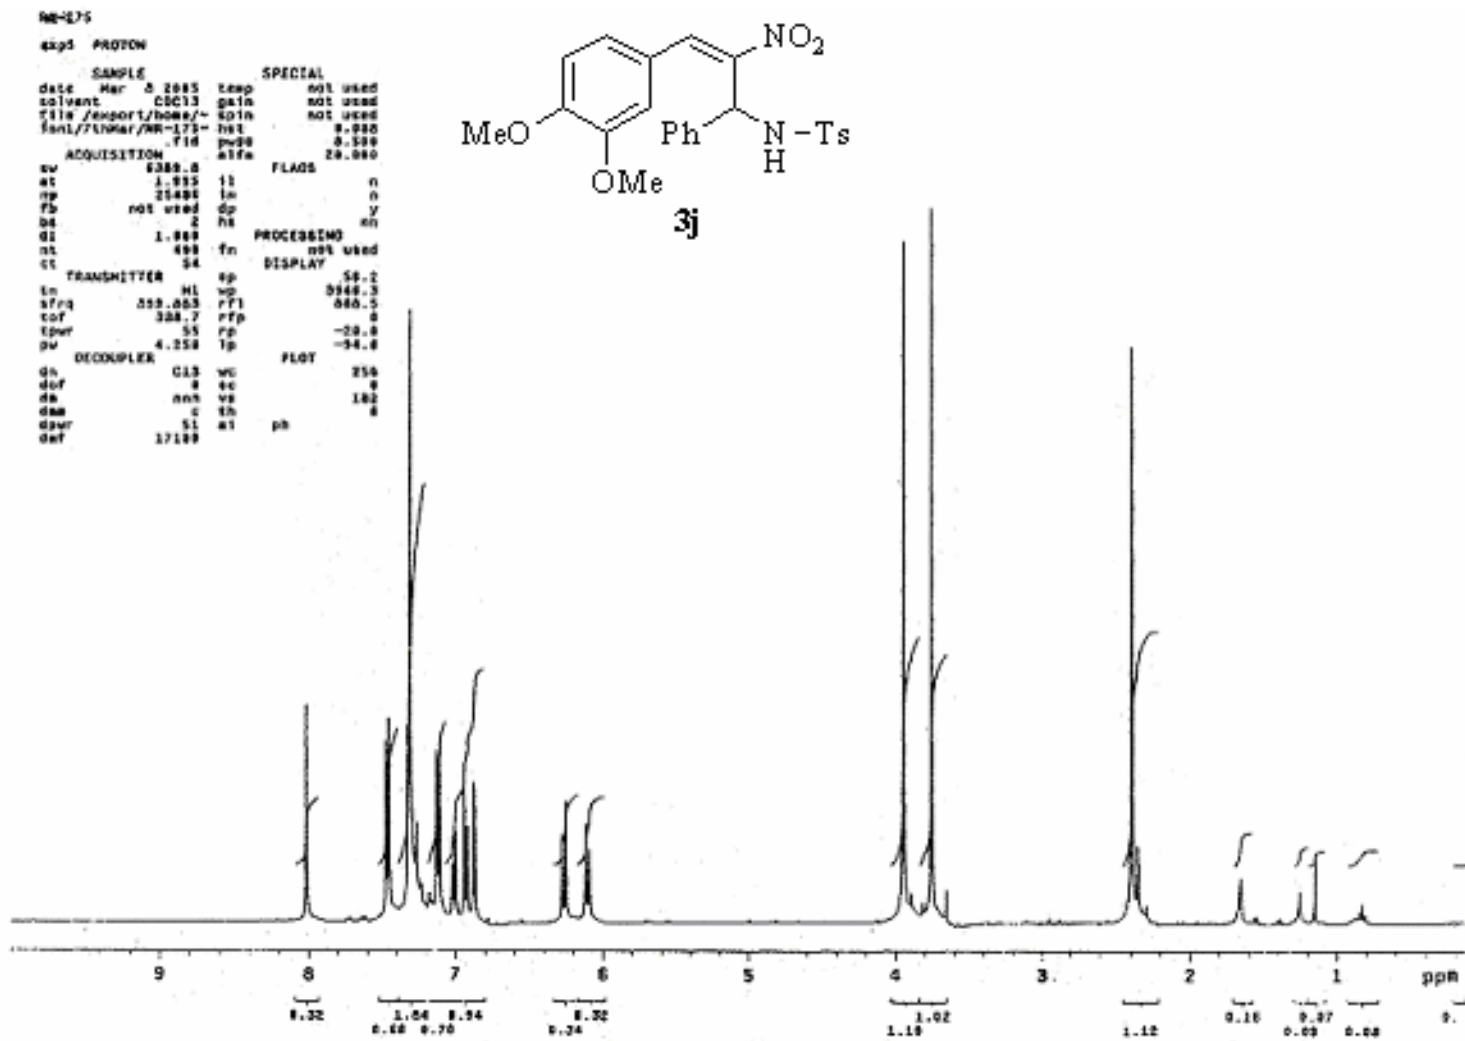

Figure S23. <sup>1</sup>H NMR Spectrum of **3j**

MR-175

exp3 s2pu1

| SAMPLE      |             | SPECIAL    |          |
|-------------|-------------|------------|----------|
| date        | Feb 28 2005 | temp       | not used |
| solvent     | CDCl3       | gain       | 16       |
| Title       | exp         | spin       | not used |
| ACQUISITION |             | ns1        | 0.000    |
| sw          | 25000.0     | sw90       | 11.500   |
| at          | 1.015       | alt0       | 20.000   |
| rg          | 10752       | FLAG       |          |
| rb          | 15000       | l1         | n        |
| rb          | 4           | l2         | n        |
| ds          | 3.000       | dp         | y        |
| nt          | 1000        | ns         | nn       |
| ct          | 200         | PROCESSING |          |
| TRANSMITTER |             | tb         | 2.00     |
| ta          | Cl3         | fn         | not used |
| ifrq        | 75.430      | DISPLAY    |          |
| tof         | 740.0       | sp         | 40.7     |
| lqwr        | 50          | vs         | 1500.0   |
| pv          | 4.750       | rfl        | 10000.0  |
| DECOUPLER   |             | rfp        | 500.0    |
| dn          | H1          | rp         | 100.0    |
| dof         | 0           | lp         | -324.0   |
| ds          | VVV         | PLOT       |          |
| sm          | w           | uc         | 250      |
| zpw         | 30          | sc         | 0        |
| gat         | 11000       | vs         | 104      |
|             |             | th         | 10       |
|             |             | re         | ph       |

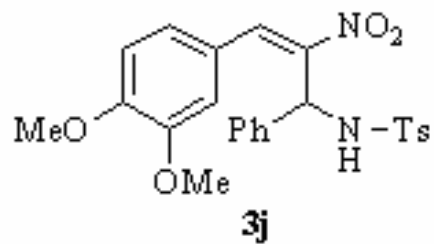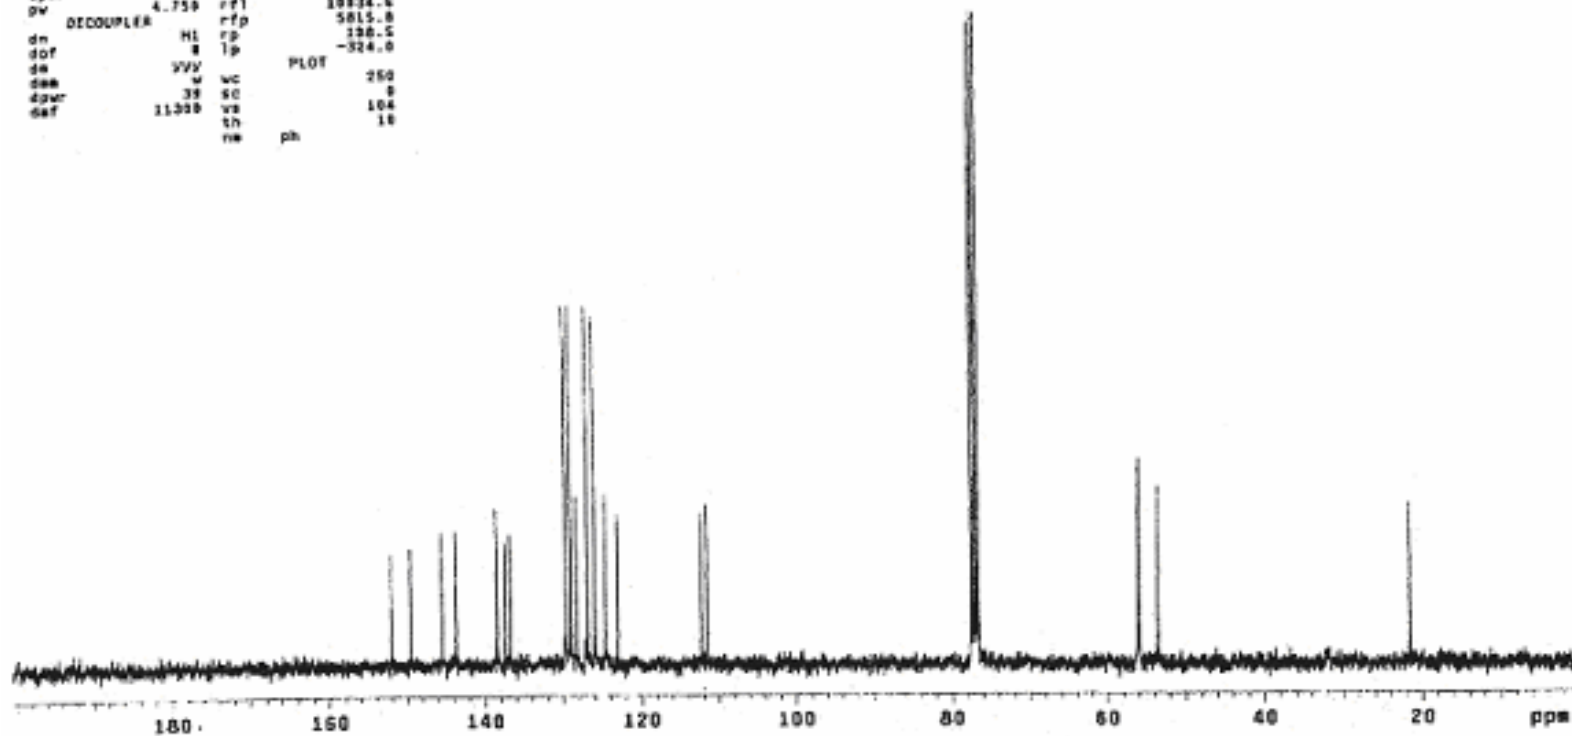

Figure S24. <sup>13</sup>C NMR Spectrum of **3j**

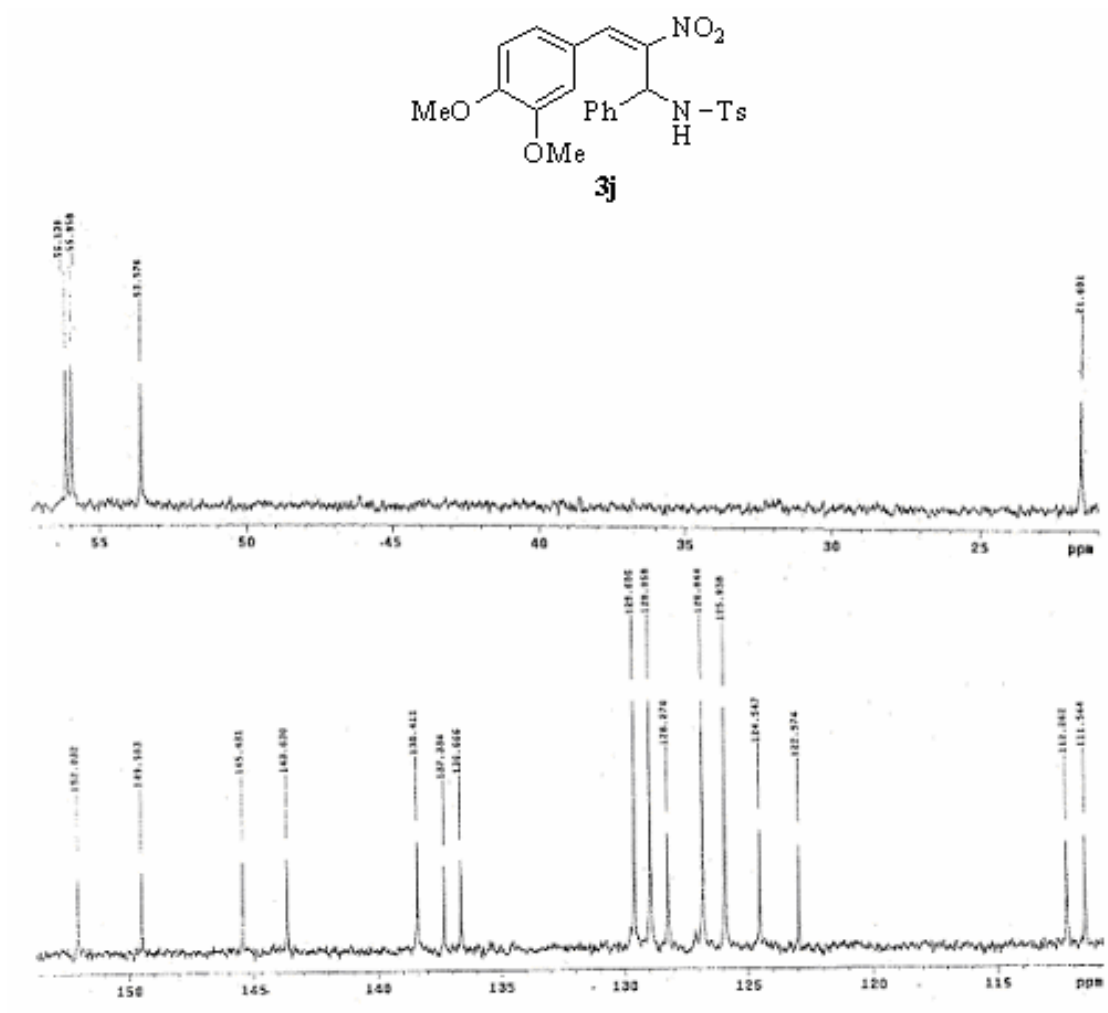

Figure S25. <sup>13</sup>C NMR Spectrum of **3j** (Expansion)

```

NR-177
exp5  PROTON
SAMPLE
date   Oct 25 2005 1940 SPECIAL not used
solvent CDCL3 gain not used
file   /export/home/ q21n not used
Invt/October/25th/- hit 0.000
NR-177.f16 pv99 8.500
ACQUISITION
sw 10010.0 Hz FLAGS n
at 1.593 s1 m
no 38902 in m
fo not used 69 y
ba 2 hz nn
ol 1.000 PROCESSING
oc 400 F0 not used
ct 40 DISPLAY
TRANSMITTER
tn H1 M0 -34.5
sfrq 355.883 r71 4024.0
tof 200.0 rfp 2757.1
tpr 55 rp 17.3
pw 4.250 tp -124.9
DECOUPLER
dn C13 wc 250
dof 0 sc 0
dm nnn vs 22
dca C th 4
dpr 51 w1 ph
dof 17100

```

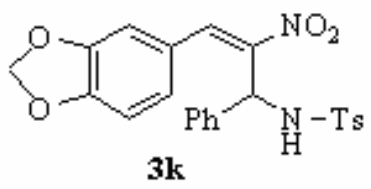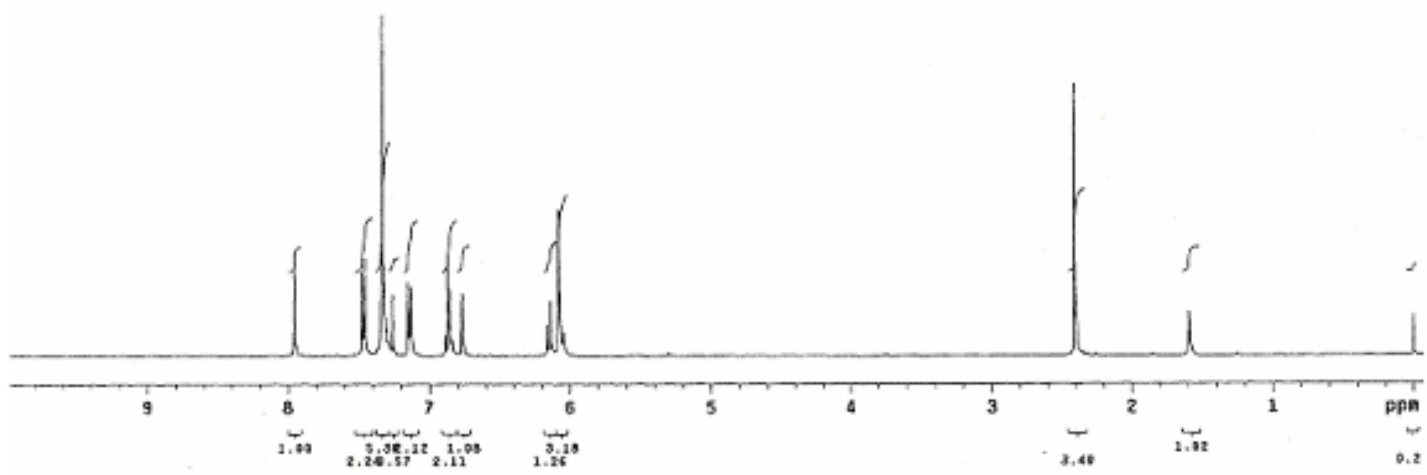

Figure S26. <sup>1</sup>H NMR Spectrum of 3k

NR-177

exp6 CARBON

| SAMPLE      |            | SPECIAL    |          |
|-------------|------------|------------|----------|
| date        | NOV 2 1995 | temp       | not used |
| solvent     | CDCl3      | gain       | not used |
| File        | exp        | spin       | not used |
| ACQUISITION |            | int        | 0.000    |
| sv          | 25125.6    | pw90       | 14.000   |
| at          | 1.100      | ctfa       | 20.000   |
| np          | 60270      | FLAGS      |          |
| fb          | 13500      | f1         | n        |
| bs          | 4          | fm         | n        |
| ds          | 1.000      | dp         | y        |
| nl          | 50000      | hs         | wn       |
| ct          | 204        | PROCESSING |          |
| TRANSMITTER | CL3        | fb         | 1.00     |
| tn          | CL3        | fn         | not used |
| sfrq        | 100.621    | DISPLAY    |          |
| tof         | 1554.8     | ep         | 42.2     |
| tpwr        | 50         | vp         | 10017.3  |
| pm          | 7.000      | rf1        | 3251.4   |
| DECOUPLER   |            | rfp        | 3742.3   |
| dn          | HL         | ty         | 71.5     |
| dof         | 0          | lp         | -347.8   |
| dm          | yyv        | PLOT       |          |
| dms         | w          | vc         | 250      |
| edw         | 41         | ec         | 0        |
| dwt         | 11500      | vs         | 30       |
|             |            | th         | 5        |
|             |            | al         | na ph    |

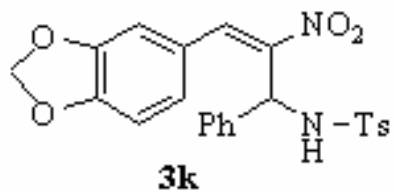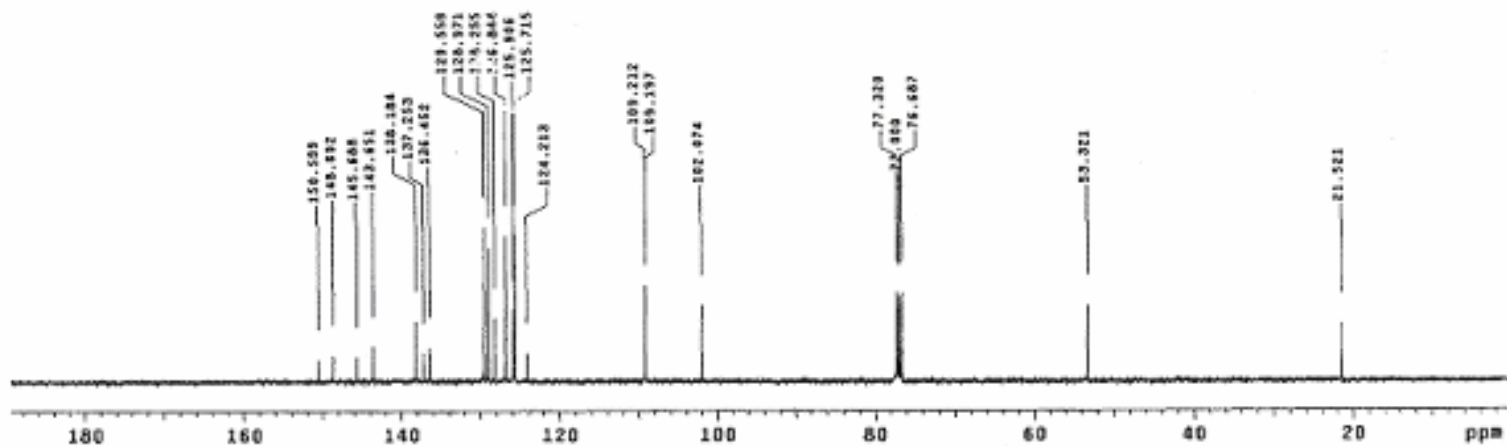

Figure S27. <sup>13</sup>C NMR Spectrum of **3k**
